# Supplementary material for: Catalytic asymmetric formal synthesis of beraprost
Source: publisher site journal article supplement (doi:10.3762/bjoc.11.285), 2015-12-18
Supplement: Additional file 1 [file 1860-5397-11-285-S1.pdf]

## **Supporting Information**

**for**

### **Catalytic asymmetric formal synthesis of beraprost**

Yusuke Kobayashi, Ryuta Kuramoto, and Yoshiji Takemoto\*

Address: Graduate School of Pharmaceutical Sciences, Kyoto University, Yoshida, Sakyo-ku, Kyoto  
606-8501, Japan

Email: Yoshiji Takemoto - [takemoto@pharm.kyoto-u.ac.jp](mailto:takemoto@pharm.kyoto-u.ac.jp)

\*[Corresponding author](#)

### **Experimental procedures and characterization data**

## CONTENTS

|                                                                |     |
|----------------------------------------------------------------|-----|
| 1. General information .....                                   | S3  |
| 2. Experimental details .....                                  | S3  |
| 3. Reference .....                                             | S13 |
| 4. Copies of $^1\text{H}$ and $^{13}\text{C}$ NMR charts ..... | S14 |
| 5. Copies of HPLC charts .....                                 | S31 |
| 6. Computational details .....                                 | S35 |

## 1. General information

All reactions were carried out under a positive atmosphere of argon in dried glassware. Analytical thin-layer chromatography was performed with Silica gel 60 (Merck). Column chromatography was performed on Merck silica gel 60 (230–400 mesh) or Fuji Silysia silica gel (NH, 100–200 mesh), and flash column chromatography was performed on Cica silica gel 60 (spherical/40–100  $\mu\text{m}$ ). Proton nuclear magnetic resonance ( $^1\text{H}$  NMR) spectra were recorded on a JEOL JNM-ECA 500 at 500 MHz, and AL400 at 400 MHz. Chemical shifts are reported relative to  $\text{Me}_4\text{Si}$  ( $\delta$  0.00) in  $\text{CDCl}_3$ . Multiplicity is indicated by one or more of the following: s (singlet); d (doublet); t (triplet); q (quartet); m (multiplet); br (broad). Carbon nuclear magnetic resonance ( $^{13}\text{C}$  NMR) spectra were recorded on a JEOL JNM-ECA 500 at 126 MHz, and AL400 at 100 MHz. Chemical shifts are reported relative to  $\text{Me}_4\text{Si}$  ( $\delta$  0.00) in  $\text{CDCl}_3$  and internal residual solvent ( $\text{MeOD-d}_4$   $\delta$  3.31). Infrared spectra were recorded on a FT/IR-4100 Fourier-transform infrared spectrometer ATR (attenuated total reflectance). High-resolution mass spectra were obtained on a Shimadzu LCMS-IT-TOF fitted with an ESI. Optical rotations were determined with a JASCO P-2200KDT polarimeter and are the average of five measurements. All melting points were measured on BÜCHI M-565 melting point apparatus and are uncorrected.

## 2. Experimental details

### Preparation of catalyst

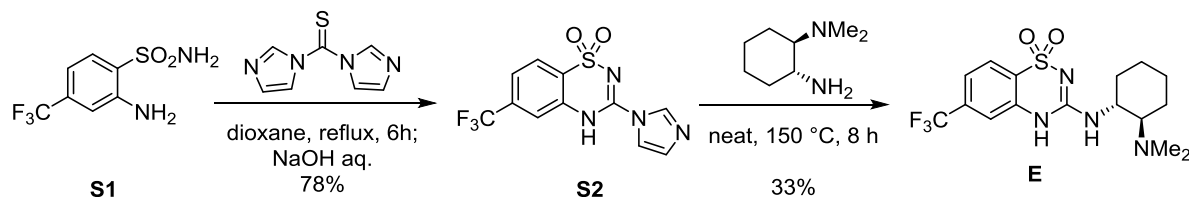

### 3-(1*H*-Imidazol-1-yl)-6-(trifluoromethyl)-4*H*-benzo[*e*][1,2,4]thiadiazine 1,1-dioxide (**S2**)

A solution of 2-amino-4-(trifluoromethyl)benzenesulfonamide [**1**] (**S1**, 2.97 g, 12.4 mmol) and *N,N'*-thiocarbonyldiimidazole (4.40 g, 24.7 mmol) in dioxane (50 mL) was refluxed for 5 h. The solvent was removed by distillation under reduced pressure, and the residue was suspended in water (50 mL). A solution of NaOH in water (2.0 g/20 mL) was added, and the solution was stirred at room temperature for 20 min. The alkaline solution was treated with 6 N HCl (40 mL). The precipitate was collected by filtration, washed with water, and dried to give the pale yellow solid of **S2** (3.07 g, 78%).

Mp: 180 °C (decomposed);  $^1\text{H}$  NMR (500 MHz,  $\text{CDCl}_3$ ):  $\delta$  9.74 (s, 1H), 8.22 (s, 1H), 7.93 (d,  $J$ =8.6 Hz, 1H), 7.75 (s, 1H), 7.57–7.58 (m, 2H) ppm, two N–H protons could not be observed;  $^{13}\text{C}$  NMR (101 MHz,  $\text{CDCl}_3$ ):  $\delta$  147.2, 145.2, 134.8, 131.9 (q,  $J$  = 31.8 Hz), 127.3, 124.3, 123.6 (q,  $J$  = 273 Hz), 122.1 (d,  $J$  = 4.8 Hz), 120.3 (q,  $J$  = 3.8 Hz), 119.3, 118.7 ppm; IR (Zn/Se-ATR) 3537, 3150, 1590, 1545, 1428, 1334  $\text{cm}^{-1}$ ; HRMS (ESI $^+$ ) Calcd. for  $\text{C}_{11}\text{H}_8\text{N}_4\text{O}_2\text{F}_3\text{S}$  ( $[\text{M}+\text{H}]^+$ ): 317.0315, found: 317.0329.

**3-(((1*R*,2*R*)-2-(Dimethylamino)cyclohexyl)amino)-6-(trifluoromethyl)-4*H*-benzo[*e*][1,2,4]thiadiazine 1,1-dioxide (Catalyst E)**

The mixture of **S2** (318.3 mg, 1.0 mmol) and (*R, R*)-*N*<sup>1</sup>,*N*<sup>1</sup>-dimethyl-*trans*-diaminocyclohexane [2] (213.4 mg, 1.5 mmol) was stirred at 150 °C for 6 h. The reaction mixture was dissolved in CHCl<sub>3</sub> (20 mL) and was washed with saturated aqueous NH<sub>4</sub>Cl solution (10 mL) and saturated aqueous NaHCO<sub>3</sub> (10 mL). The organic layer dried over anhydrous Na<sub>2</sub>SO<sub>4</sub>. The solvent was evaporated and the resulting crude residue purified by column chromatography on silica gel (NH) eluting with chloroform/methanol (9/1) to afford **E** (128.6 mg, 33%) as brown amorphous.

<sup>1</sup>H NMR (400 MHz, CDCl<sub>3</sub>): δ 8.03 (d, *J* = 7.7 Hz, 1H), 7.47 (d, *J* = 7.4 Hz, 1H), 7.07 (s, 1H), 3.45 (brs, 1H), 2.60–2.48 (m, 8H), 2.24 (brs, 1H), 2.00–1.98 (m, 1H), 1.89–1.87 (m, 1H), 1.80–1.77 (m, 1H), 1.32–1.23 (m, 5H), ppm; <sup>13</sup>C NMR (101 MHz, CDCl<sub>3</sub>): δ 152.6, 137.8, 134.1 (q, *J* = 32.6 Hz), 125.2, 124.7, 123.0 (q, *J* = 273 Hz), 120.0 (d, *J* = 3.8 Hz), 114.6, 67.6, 52.8, 40.2, 32.8, 29.7, 24.4, 22.2 ppm; IR (Zn/Se-ATR) 3304, 2939, 1633, 1125 cm<sup>-1</sup>; HRMS (ESI<sup>+</sup>) Calcd. for C<sub>16</sub>H<sub>22</sub>N<sub>4</sub>O<sub>2</sub>F<sub>3</sub>S ([M+H]<sup>+</sup>): 391.1410; found: 391.1391.

Catalytic asymmetric synthesis of important intermediate **2**

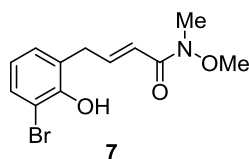

**(*E*)-4-(3-Bromo-2-hydroxyphenyl)-*N*-methoxy-*N*-methylbut-2-enamide (**7**)**

To the solution of *o*-bromophenol (**9**, 9.84 g, 56.9 mmol) and K<sub>2</sub>CO<sub>3</sub> (15.3 g, 111 mmol) in acetone (125 mL) was added allyl bromide (10 g, 82.2 mmol), and the reaction mixture was refluxed at 70 °C for 2 h. The reaction mixture was filtered through a pad of Celite and the filtrate was evaporated under reduced pressure. The resulting mixture was extracted with EtOAc three times, and the combined organic layers were washed with brine, dried over Na<sub>2</sub>SO<sub>4</sub>, and concentrated under reduced pressure to give the crude allyl ether, which was used for the next reaction without further purification.

The crude ether (11.0 g) was dissolved in hexane (130 mL), and Et<sub>2</sub>AlCl (1.0 M in hexane, 53 mL, 53 mmol) was added at room temperature. After being stirred at the same temperature for 3.5 h, the reaction mixture was cooled to 0 °C and quenched by careful addition of 2N HCl (35 mL). The aqueous phase was then separated and extracted with EtOAc three times. The combined organic layers were washed with brine, dried over Na<sub>2</sub>SO<sub>4</sub>, and concentrated under reduced pressure to afford 2-allyl-6-bromophenol (**11**, 12.7 g), which was directly subject to the next ozonolysis. A crude solution of **11** in MeOH (150 mL) was cooled to -78 °C, and O<sub>3</sub> gas was bubbled through the solution at -78 °C until the starting material had disappeared. The reaction was quenched with Me<sub>2</sub>S (5.6 mL, 75.7 mmol), slowly warmed to room temperature before the addition of water (60 mL). The resulting mixture was stirred for 1 h and concentrated under reduced

pressure. The residue was diluted with EtOAc and washed with water. The organic layer was dried over Na<sub>2</sub>SO<sub>4</sub> and concentrated in vacuo to give the crude aldehyde as a mixture with the corresponding lactol, which seemed to be unstable on silica gel [3].

Then, the resulting crude (**12**, 9.66 g) was immediately dissolved in THF (150 mL) and *N*-Methoxy-*N*-methyl(triphenylphosphoranylidene)acetamide (**13**, 18.2 g, 50 mmol) was added at 0°C. The reaction mixture was stirred at room temperature for 1.5 hours. After concentration, the residue was directly purified by column chromatography on silica gel (*n*-hexane/EtOAc = 3/1) to afford **7** as white solid (9.8 g, 55% in 4 steps).

White solid; M.p. 103–105 °C; <sup>1</sup>H NMR (500 MHz, CDCl<sub>3</sub>): δ 7.35 (dd, *J* = 8.0, 1.4 Hz, 1H), 7.11 (t, *J* = 7.0 Hz, 1H), 7.08 (t, *J* = 7.0 Hz, 1H), 6.76 (t, *J* = 7.9 Hz, 1H), 6.44 (d, *J* = 15.2 Hz, 1H), 5.63 (s, 1H), 3.68 (s, 3H), 3.61 (dd, *J* = 6.9, 1.4 Hz, 2H), 3.23 (s, 3H) ppm; <sup>13</sup>C NMR (100 MHz, CDCl<sub>3</sub>): δ 166.7, 150.1, 144.3, 130.3, 129.7, 126.2, 121.5, 120.0, 110.6, 61.8, 33.5, 32.2 ppm; IR (Zn/Se-ATR) 3154, 1657, 1612, 1448 cm<sup>-1</sup>; HRMS (ESI<sup>+</sup>) Calcd. for C<sub>12</sub>H<sub>15</sub>BrNO<sub>3</sub> ([M+H]<sup>+</sup>): 300.0230, found: 300.0216; Elemental analysis Calcd. for C<sub>12</sub>H<sub>14</sub>BrNO<sub>3</sub>: C, 48.02; H, 4.70; N, 4.67; found: C, 47.83; H, 4.67; N, 4.73.

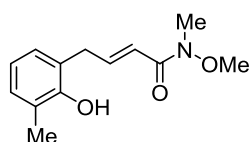

**8**

**(*E*)-4-(2-Hydroxy-3-methylphenyl)-*N*-methoxy-*N*-methylbut-2-enamide (**8**)**

A solution of 2-allyl-6-methylphenol (**10**, 2.01 g, 13.6 mmol) in MeOH (50 mL) was cooled to –78 °C. O<sub>3</sub> gas was bubbled through the solution at –78 °C until the starting material had disappeared. The reaction was quenched with Me<sub>2</sub>S (1.1 mL, 14.8 mmol), slowly warmed to room temperature before the addition of water (20 mL). The resulting mixture was stirred for 1 h and concentrated under reduced pressure. The residue was diluted with EtOAc and washed with water. The organic layer was dried over Na<sub>2</sub>SO<sub>4</sub> and concentrated in vacuo to give the crude aldehyde, which was similarly, as described above, treated with **13** (4.94 g, 13.6 mmol) in THF (50 mL). The reaction mixture was stirred for 1.5 hours. After concentration, the residue was directly purified by column chromatography on silica gel (*n*-hexane/EtOAc = 3/1) to afford **8** as pale yellow solid (1.53 g, 48% in 2 steps).

Pale yellow solid; M.p. 101.8–103.7 °C; <sup>1</sup>H NMR (500 MHz, CDCl<sub>3</sub>): δ 7.14 (dt, *J*<sub>1</sub> = 15.3 Hz, *J*<sub>2</sub> = 6.7 Hz, 1H), 7.02 (d, *J* = 7.4 Hz, 1H), 6.97 (t, *J* = 7.4 Hz, 1H), 6.80 (d, *J* = 7.6 Hz, 1H), 6.43 (d, *J* = 15.2 Hz, 1H), 4.88 (s, 1H), 3.66 (s, 3H), 3.57 (dd, *J*<sub>1</sub> = 6.9 Hz, *J*<sub>2</sub> = 1.4 Hz, 2H), 3.26 (s, 3H), 2.25 (s, 3H) ppm; <sup>13</sup>C NMR (100 MHz, CDCl<sub>3</sub>): δ 166.9, 152.3, 145.9, 129.4, 128.1, 124.4, 123.9, 120.3, 119.3, 61.7, 33.7, 32.4, 16.1 ppm; IR (Zn/Se-ATR) 3394, 3008, 2977, 2932, 2885, 1653, 1614, 1469, 1196 cm<sup>-1</sup>; HRMS (ESI<sup>+</sup>) Calcd. for C<sub>13</sub>H<sub>17</sub>NNaO<sub>3</sub> ([M+Na]<sup>+</sup>): 258.1101, found: 258.1090.

#### General procedure for asymmetric intramolecular oxa-Michael reaction (**5**, **6**)

To a solution of **7** or **8** (1.0 mmol) in CH<sub>2</sub>Cl<sub>2</sub> (10 mL) was added catalyst **A–E** (1–10 mol %), and the resulting mixture was stirred for the indicated time in Table 1. The reaction mixture was then evaporated and the resulting crude residue was purified by column chromatography on silica gel eluting with *n*-hexane/ethyl acetate (2/1) to afford **5** or **6**.

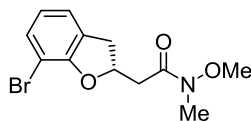

**5**

#### (*R*)-2-(7-Bromo-2,3-dihydrobenzofuran-2-yl)-*N*-methoxy-*N*-methylacetamide (**5**)

White solid; Mp 51–52 °C; <sup>1</sup>H NMR (500 MHz, CDCl<sub>3</sub>): δ 7.24 (d, *J* = 8.0 Hz, 1H), 7.08 (d, *J* = 7.4 Hz, 1H), 6.71 (dd, *J*<sub>1</sub> = *J*<sub>2</sub> = 7.6 Hz, 1H), 5.31–5.25 (m, 1H), 3.69 (s, 3H), 3.56 (dd, *J*<sub>1</sub> = 15.9 Hz, *J*<sub>2</sub> = 9.0 Hz, 1H), 3.20 (m, 4H), 3.06 (dd, *J*<sub>1</sub> = 15.8 Hz, *J*<sub>2</sub> = 7.2 Hz, 1H), 2.78 (dd, *J*<sub>1</sub> = 16.0 Hz, *J*<sub>2</sub> = 8.0 Hz, 1H) ppm; <sup>13</sup>C NMR (126 MHz, CDCl<sub>3</sub>): δ 170.9, 156.6, 131.2, 128.3, 124.2, 121.9, 102.6, 80.2, 61.6, 38.4, 36.7, 32.1 ppm; IR (Zn/Se-ATR) 1650, 1453 cm<sup>-1</sup>; HRMS (ESI<sup>+</sup>) Calcd. for C<sub>12</sub>H<sub>15</sub>BrNO<sub>3</sub> ([M+H]<sup>+</sup>): 300.0230, found: 300.0206; HPLC [CHIRALPAK IB, *n*-hexane/2-propanol = 95/5, 1.0 mL/min, λ = 220 nm, retention times: (minor) 10.3 min (major) 12.1 min]; [α]<sub>D</sub><sup>26</sup> +43.6 (*c* 0.83, CHCl<sub>3</sub>) for 86% ee.

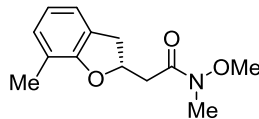

**6**

#### (*R*)-*N*-Methoxy-*N*-methyl-2-(7-methyl-2,3-dihydrobenzofuran-2-yl)acetamide (**6**)

Colorless oil; <sup>1</sup>H NMR (400 MHz, CDCl<sub>3</sub>): δ 6.99 (d, *J* = 7.3 Hz, 1H), 6.92 (d, *J* = 7.3 Hz, 1H), 6.74 (dd, *J*<sub>1</sub> = *J*<sub>2</sub> = 7.6 Hz, 1H), 5.23–5.19 (m, 1H), 3.67 (s, 3H), 3.45 (dd, *J*<sub>1</sub> = 15.6 Hz, *J*<sub>2</sub> = 9.2 Hz, 1H), 3.21 (s, 3H), 3.13 (dd, *J*<sub>1</sub> = 15.8 Hz, *J*<sub>2</sub> = 5.7 Hz, 1H), 2.94 (dd, *J*<sub>1</sub> = 15.6 Hz, *J*<sub>2</sub> = 6.9 Hz, 1H), 2.71 (dd, *J*<sub>1</sub> = 15.6 Hz, *J*<sub>2</sub> = 7.3 Hz, 1H), 2.19 (s, 3H) ppm; <sup>13</sup>C NMR (101 MHz, CDCl<sub>3</sub>): δ 171.2, 157.4, 129.1, 125.6, 122.3, 120.2, 119.4, 78.8, 61.2, 38.3, 35.9, 31.8, 15.2 ppm; IR (Zn/Se-ATR) 2939, 1660, 1466, 1439, 1193 cm<sup>-1</sup>; HRMS (ESI<sup>+</sup>) Calcd. for C<sub>13</sub>H<sub>18</sub>NO<sub>3</sub> ([M+H]<sup>+</sup>): 236.1281, found: 236.1284; HPLC [CHIRALPAK IB, *n*-hexane/2-propanol = 95/5, 1.0 mL/min, λ = 238 nm, retention times: (minor) 8.5 min (major) 7.8 min]; [α]<sub>D</sub><sup>26</sup> +3.88 (*c* 1.48, CHCl<sub>3</sub>) for 91% ee.

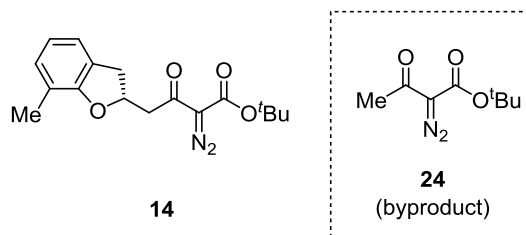

***tert*-Butyl (*R*)-2-diazo-4-(7-methyl-2,3-dihydrobenzofuran-2-yl)-3-oxobutanoate (**14**)**

To a solution of LHMDS (16.2 mL, 16.2 mmol, 1.0 M solution in THF) in dry THF (16 mL) was added *t*-BuOAc (1.88 g, 16.2 mmol) at  $-40\text{ }^{\circ}\text{C}$  dropwise over 10 min under argon atmosphere, and the reaction mixture was stirred at the same temperature for 30 min order to generate lithium enolate. To the reaction mixture was added THF solution (16.0 mL) of **6** (1.15 g, 5.37 mmol) dropwise over 15 min, and the reaction mixture was stirred at the same temperatures until TLC indicated the reaction was complete (30 min). The reaction was quenched with saturated aqueous  $\text{NH}_4\text{Cl}$  solution, and the product was extracted with EtOAc three times. The combined organic layers were washed with brine, dried over  $\text{Na}_2\text{SO}_4$ , and concentrated under reduced pressure to furnish the crude  $\beta$ -ketoester (1.88 g), which was dissolved in THF (40 mL) and  $\text{CH}_3\text{CN}$  (10 mL). To this solution were added 2-azido-1,3-dimethylimidazolium hexafluorophosphate (ADMP; 2.30 g, 8.06 mmol) and  $\text{K}_2\text{HPO}_4$  (1.87 g, 10.75 mmol) successively at  $0\text{ }^{\circ}\text{C}$ , and the reaction mixture was stirred for 2 h, before being quenched with saturated aqueous  $\text{NH}_4\text{Cl}$  solution (15 mL) and water (15 mL). The organic layers were extracted with  $\text{CHCl}_3$  three times. The combined extracts were washed with brine (30 mL), dried over anhydrous  $\text{Na}_2\text{SO}_4$ , and concentrated under reduced pressure. The residue was purified by column chromatography on silica gel (*n*-hexane/EtOAc = 10/1) to afford **14** including an inseparable impurity **24** (1.51 g; **14**/**24** = 10/1) as yellow oil.

$^1\text{H}$  NMR (400 MHz,  $\text{CDCl}_3$ , **14**/**24** = 10:1): product **14**,  $\delta$  6.98 (d,  $J = 7.2$  Hz, 1H), 6.91 (d,  $J = 7.6$  Hz, 1H), 6.73 (dd,  $J_1 = J_2 = 7.6$  Hz, 1H), 5.28–5.19 (m, 1H), 3.49 (dd,  $J_1 = 16.4$  Hz,  $J_2 = 6.4$  Hz, 1H), 3.43 (dd,  $J_1 = 16.0$  Hz,  $J_2 = 6.8$  Hz, 1H), 3.11 (dd,  $J_1 = 16.8$  Hz,  $J_2 = 6.8$  Hz, 1H), 2.90 (dd,  $J_1 = 16.0$  Hz,  $J_2 = 6.4$  Hz, 1H), 2.17 (s, 3H), 1.51 (s, 9H); signals of **24**: 2.44 (s, 3H), 1.53 (s, 9H) ppm;  $^{13}\text{C}$  NMR (101 MHz,  $\text{CDCl}_3$ ): product **14**,  $\delta$  190.0, 160.2, 157.5, 129.1, 125.4, 122.2, 120.2, 119.6, 83.3, 78.1, 77.2, 46.3, 35.9, 28.1, 15.1; signal of **24**: 28.2 ppm; HRMS ( $\text{ESI}^+$ ) Calcd. for  $\text{C}_{17}\text{H}_{20}\text{N}_2\text{NaO}_4$  ( $[\text{M}+\text{Na}]^+$ ): 339.1315, found: 339.1313.

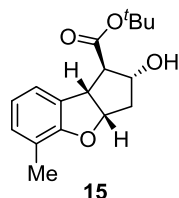

***tert*-Butyl (1*R*, 2*R*, 3*aS*, 8*bS*)-2-hydroxy-5-methyl-2,3,3*a*,8*b*-tetrahydro-1*H*-cyclopenta- $\beta$ -benzofuran-1-carboxylate (**15**)**

To a crude of **14** (758.0 mg, 2.40 mmol) in  $\text{CH}_2\text{Cl}_2$  (20 mL) was added  $\text{Rh}_2(\text{OAc})_4$  (10.6 mg, 1.0 mol %), and the resulting mixture was stirred at ambient temperature for 15 min, when TLC indicated the reaction

was complete. MeOH (10 mL) was then added, and NaBH<sub>4</sub> (271.9 mg, 7.19 mmol) was added portionwise –40 °C. The mixture was stirred at –40 °C for 2 h and at the ambient temperature for additional 2 h, before being quenched with saturated aqueous NH<sub>4</sub>Cl solution (20 mL). The organic materials were extracted with EtOAc three times, and the combined organic layer was washed with brine (50 mL), dried over anhydrous Na<sub>2</sub>SO<sub>4</sub>, and evaporated to give the crude residue, which was purified by column chromatography on silica gel eluting with *n*-hexane/ethyl acetate (7/1) to afford **15** (490.0 mg, 60% in 4 steps from **6**) as white solid; Mp.73.2–73.4 °C; <sup>1</sup>H NMR (500 MHz, CDCl<sub>3</sub>): δ 7.12 (d, *J* = 7.2 Hz, 1H), 6.97 (d, *J* = 7.4 Hz, 1H), 6.79 (dd, *J*<sub>1</sub> = *J*<sub>2</sub> = 7.4 Hz, 1H), 5.17 (ddd, *J*<sub>1</sub> = 9.0 Hz, *J*<sub>2</sub> = 7.2 Hz, *J*<sub>3</sub> = 5.2 Hz, 1H), 4.38–4.33 (m, 1H), 3.92 (t, *J* = 8.0 Hz, 1H), 2.79 (t, *J* = 7.0 Hz, 1H), 2.59 (ddd, *J*<sub>1</sub> = 13.4 Hz, *J*<sub>2</sub> = *J*<sub>3</sub> = 6.7 Hz, 1H), 2.39 (dd, *J*<sub>1</sub> = 4.7 Hz, *J*<sub>2</sub> = 3.0 Hz, 1H), 2.20 (s, 3H), 2.07 (ddd, *J*<sub>1</sub> = 13.4 Hz, *J*<sub>2</sub> = 8.0 Hz, *J*<sub>3</sub> = 5.3 Hz, 1H), 1.53 (s, 9H) ppm; <sup>13</sup>C NMR (126 MHz, CDCl<sub>3</sub>): δ 172.7, 157.3, 129.9, 129.0, 122.2, 120.7, 120.0, 84.8, 81.8, 74.6, 60.3, 48.0, 41.1, 28.2, 15.3 ppm; IR (Zn/Se-ATR) 3466, 2978, 2872, 1699 cm<sup>–1</sup>; HRMS (ESI<sup>+</sup>) Calcd. for C<sub>17</sub>H<sub>22</sub>NaO<sub>4</sub> ([M+Na]<sup>+</sup>): 313.1410, Found: 313.1398; [α]<sub>D</sub><sup>26</sup> +80.2 (*c* 0.79, CHCl<sub>3</sub>).

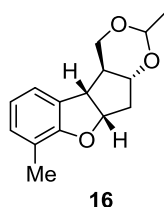

### Acetal **16**

To a solution of **15** (513.5 mg, 1.77 mmol) in Et<sub>2</sub>O (17 mL) was added LiBH<sub>4</sub> (115.6 mg, 5.31 mol), and the resulting mixture was stirred at ambient temperature for 9 h. The reaction was quenched with 1 N aqueous HCl solution (10 mL), and the organic materials were extracted with EtOAc three times. The combined extracts were washed with brine (20 mL), dried over anhydrous Na<sub>2</sub>SO<sub>4</sub>, and evaporated to afford the crude diol (367.9 mg), which was then dissolved in THF (16 mL). To this solution were added 1,1-diethoxyethane (2.5 mL, 17.6 mmol) and *p*-TsOH·H<sub>2</sub>O (31.8 mg, 10 mol%), and the reaction mixture was stirred at 60 °C for 3 h before being quenched with saturated aqueous NaHCO<sub>3</sub> solution (15 mL). The mixture was extracted with EtOAc three times, and the combined extracts were washed with brine (30 mL), dried over anhydrous Na<sub>2</sub>SO<sub>4</sub>, and evaporated to give the crude acetal, which was purified by column chromatography on silica gel eluting with *n*-hexane/ethyl acetate (15/1) to afford **16** (292.6 mg, 71% in 2 steps from **15**) as white solid; Mp.125.5–129.0 °C; <sup>1</sup>H NMR (500 MHz, CDCl<sub>3</sub>): δ 6.97 (d, *J* = 7.4 Hz, 1H), 6.91 (d, *J* = 7.2 Hz, 1H), 6.75 (dd, *J*<sub>1</sub> = *J*<sub>2</sub> = 7.4 Hz, 1H), 5.10 (q, *J* = 7.5 Hz, 1H), 4.72 (q, *J* = 5.0 Hz, 1H), 4.39 (dd, *J*<sub>1</sub> = 10.5 Hz, *J*<sub>2</sub> = 4.2 Hz, 1H), 3.71 (dd, *J*<sub>1</sub> = *J*<sub>2</sub> = 10.5 Hz, 1H), 3.41 (td, *J*<sub>1</sub> = 11.0, *J*<sub>2</sub> = 6.3 Hz, 1H), 3.15 (t, *J* = 10.0 Hz, 1H), 2.74 (ddd, *J*<sub>1</sub> = 12.8 Hz, *J*<sub>2</sub> = *J*<sub>3</sub> = 6.4 Hz, 1H), 2.20 (s, 3H), 1.97 (td, *J*<sub>1</sub> = 12.1 Hz, *J*<sub>2</sub> = 5.9 Hz, 1H), 1.88 (ddd, *J*<sub>1</sub> = 21.6 Hz, *J*<sub>2</sub> = 10.7 Hz, *J*<sub>3</sub> = 4.2 Hz, 1H), 1.36 (d, *J* = 5.2 Hz, 3H) ppm; <sup>13</sup>C NMR (126 MHz, CDCl<sub>3</sub>): δ 157.5, 129.8, 128.0, 121.3, 120.3, 120.1, 99.5, 83.4, 79.6, 70.8, 48.1, 45.3, 37.9, 20.6, 15.3 ppm; IR (Zn/Se-ATR) 2952, 1464, 1384 cm<sup>–1</sup>; [α]<sub>D</sub><sup>26</sup> +7.5 (*c* 0.4, CHCl<sub>3</sub>).



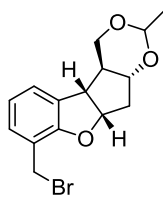

17

### Bromide 17

To the solution of **16** (40.0 mg, 0.162 mmol) and NBS (34.7 mg, 0.195 mmol) in  $\text{CCl}_4$  (2.5 mL) was added azobisisobutyronitrile (AIBN, 3.2 mg, 0.0195 mmol) at room temperature, and the mixture was heated under reflux for 3 h. The crude mixture was filtered through a pad of Celite, and the filtrate was concentrated to give the crude, which was then purified by column chromatography on silica gel eluting with *n*-hexane/ethyl acetate (10/1) to afford **17** (7.4 mg, 14%) as yellow oil;  $^1\text{H}$  NMR (500 MHz,  $\text{CDCl}_3$ ):  $\delta$  7.17 (d,  $J = 7.5$  Hz, 1H), 7.04 (d,  $J = 7.0$  Hz, 1H), 6.82 (dd,  $J_1 = J_2 = 7.5$  Hz, 1H), 5.23–5.19 (m, 1H), 4.73 (q,  $J = 5.0$  Hz, 1H), 4.53 (d,  $J = 10.0$  Hz, 1H), 4.46 (d,  $J = 10.0$  Hz, 1H), 4.40 (dd,  $J_1 = 10.0$  Hz,  $J_2 = 5.0$  Hz, 1H), 3.73 (t,  $J_1 = 11.0$  Hz, 1H), 3.44 (td,  $J_1 = 11.0$  Hz,  $J_2 = 6.5$  Hz, 1H), 3.18 (dd,  $J_1 = 11.0$  Hz,  $J_2 = 9.0$  Hz, 1H), 2.78 (ddd,  $J_1 = 12.5$  Hz,  $J_2 = J_3 = 6.5$  Hz, 1H), 2.01 (td,  $J_1 = 12.2$  Hz,  $J_2 = 5.8$  Hz, 1H), 1.85 (ddd,  $J_1 = 21.7$  Hz,  $J_2 = 10.8$  Hz,  $J_3 = 4.4$  Hz, 1H), 1.36 (d,  $J = 5.2$  Hz, 3H) ppm;  $^{13}\text{C}$  NMR (126 MHz,  $\text{CDCl}_3$ ):  $\delta$  157.3, 129.6, 129.5, 124.5, 120.9, 99.6, 84.5, 79.5, 70.7, 48.2, 45.1, 37.8, 28.0, 20.6 ppm; IR (Zn/Se-ATR) 2986, 2938, 2856, 1728, 1599, 1455  $\text{cm}^{-1}$ ;  $[\alpha]_D^{26} +40.6$  ( $c$  1.15,  $\text{CHCl}_3$ ).

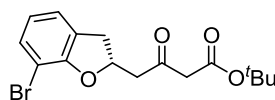

19

### *tert*-Butyl (*R*)-4-(7-bromo-2,3-dihydrobenzofuran-2-yl)-3-oxobutanoate (**19**)

To a solution of LiHMDS (1.2 mL, 1.2 mmol, 1.0 M solution in THF) in dry THF (1.2 mL) was added *t*-BuOAc (139.4 mg, 1.2 mmol) at  $-40$  °C dropwise over 10 min under argon atmosphere, and the reaction mixture was stirred at the same temperature for 30 min. To the reaction mixture was added  $\text{AlBr}_3$  (324.9 mg, 1.22 mmol) in THF (3.6 mL) dropwise over 10 min, and stirred at the same temperature for 20 min, before the subsequent dropwise addition of amide **5** (120.1 mg, 0.40 mmol) in THF (1.0 mL) over 15 min. The reaction mixture was stirred at the same temperatures until TLC indicated the reaction was complete (2 h), and then quenched with saturated aqueous  $\text{NH}_4\text{Cl}$  solution. The product was extracted with EtOAc three times, and the combined organic layers were washed with brine, dried over  $\text{Na}_2\text{SO}_4$ , and concentrated under reduced pressure. The residue was purified by column chromatography on silica gel (*n*-hexane/EtOAc = 10/1) to afford **28** (128.1 mg, 90%) as a colorless oil.;  $^1\text{H}$  NMR (500 MHz,  $\text{CDCl}_3$ , keto/enol = 11:1); keto form,  $\delta$  7.26 (d,  $J = 6.3$  Hz, 1H), 7.08 (d,  $J = 7.2$  Hz, 1H), 6.73 (dd,  $J_1 = J_2 = 7.7$  Hz, 1H), 5.24 (dt,  $J_1 = 15.0$  Hz,  $J_2 = 7.5$  Hz, 1H), 3.56 (dd,  $J_1 = 15.9$  Hz,  $J_2 = 9.0$  Hz, 1H), 3.44 (s, 2H), 3.24 (dd,  $J_1 = 17.2$  Hz,  $J_2 = 5.4$  Hz, 1H), 2.97 (dd,  $J_1 = 16.9$  Hz,  $J_2 = 7.4$  Hz, 2H), 1.47 (s, 9H); selected signals for enol form: 5.19–5.13 (m, 1H), 5.00 (s, 1H), 3.10 (dd,  $J_1 = 15.8$  Hz,  $J_2 = 6.6$  Hz, 1H), 2.83 (dd,  $J_1 = 14.0$  Hz,  $J_2 = 6.0$  Hz,

1H), 2.48 (dd,  $J_1 = 14.2$  Hz,  $J_2 = 8.2$  Hz, 1H), 1.50 (s, 9H) ppm;  $^{13}\text{C}$  NMR (100 MHz,  $\text{CDCl}_3$ ):  $\delta$  200.6, 166.0, 156.3, 131.2, 127.7, 123.9, 122.0, 102.6, 82.3, 78.9, 51.0, 48.5, 36.4, 27.9 ppm; IR (Zn/Se-ATR) 2979, 1733, 1713, 1454  $\text{cm}^{-1}$ ; HRMS ( $\text{ESI}^+$ ) Calcd. for  $\text{C}_{16}\text{H}_{19}\text{NaO}_4\text{Br}$  ( $[\text{M}+\text{Na}]^+$ ): 377.0359, found: 377.0346;  $[\alpha]_D^{26} +5.2$  ( $c$  1.85,  $\text{CHCl}_3$ ).

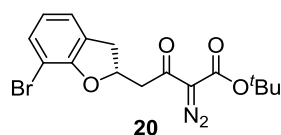

**tert-Butyl (R)-4-(7-bromo-2,3-dihydrobenzofuran-2-yl)-2-diazo-3-oxobutanoate (20)**

To a mixture of ketoester **19** (825.2 mg, 2.32 mmol) and 2-azido-1,3-dimethylimidazolium hexafluorophosphate (ADMP; 794.8 mg, 2.79 mmol) in THF/ $\text{CH}_3\text{CN}$  (16 mL/4.0 mL) was added  $\text{K}_2\text{HPO}_4$  (809.3 mg, 4.65 mmol) at 0  $^\circ\text{C}$ , and the reaction mixture was stirred at the same temperature for 2 h. The reaction was quenched with saturated aqueous  $\text{NH}_4\text{Cl}$  solution (10 mL) and additional water (8 mL). The organic materials were extracted with  $\text{CHCl}_3$  three times, and the combined extracts were washed with brine (20 mL), dried over anhydrous  $\text{Na}_2\text{SO}_4$ , and concentrated under reduce pressure to afford the crude diazoester **20**, which was then purified by column chromatography on silica gel eluting with *n*-hexane/ethyl acetate (8/1) to afford white solid. This solid was recrystallized with hexane/ $\text{Et}_2\text{O}$  (1:1), and the enantioenriched product **20** was obtained from filtrate (376.6 mg, 43%, 95% ee). White solid; Mp. 88.6–92.9  $^\circ\text{C}$ ;  $^1\text{H}$  NMR (400 MHz,  $\text{CDCl}_3$ ):  $\delta$  7.24 (d,  $J = 8.2$  Hz, 1H), 7.07 (d,  $J = 8.2$  Hz, 1H), 6.71 (dd,  $J_1 = J_2 = 7.8$  Hz, 1H), 5.36–5.29 (m, 1H), 3.57–3.51 (m, 2H), 3.17 (dd,  $J_1 = 17.2$  Hz,  $J_2 = 7.1$  Hz, 1H), 3.00 (dd,  $J_1 = 15.8$  Hz,  $J_2 = 7.1$  Hz, 1H), 1.52 (s, 9H) ppm;  $^{13}\text{C}$  NMR (100 MHz,  $\text{CDCl}_3$ ):  $\delta$  189.7, 160.3, 156.5, 131.1, 127.8, 123.9, 121.8, 102.7, 83.5, 79.3, 77.2, 46.0, 36.5, 28.3 ppm; IR (Zn/Se-ATR) 2130, 1710, 1643  $\text{cm}^{-1}$ ; HRMS ( $\text{ESI}^+$ ) Calcd. for  $\text{C}_{16}\text{H}_{17}\text{N}_2\text{NaO}_4$  ( $[\text{M}+\text{Na}]^+$ ): 403.0269, Found: 403.0264; HPLC [Chiralpak IB, *n*-hexane/2-propanol = 99/1, 1.0 mL/min,  $\lambda = 254$  nm, retention times: (major) 16.7 min (minor) 10.1 min];  $[\alpha]_D^{26} +24.3$  ( $c$  0.86,  $\text{CHCl}_3$ ) for 95% ee.

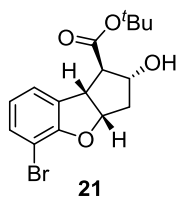

**tert-Butyl (1R,2R,3aS,8bS)-5-bromo-2-hydroxy-2,3,3a,8b-tetrahydro-1H-cyclopenta-β-benzofuran-1-carboxylate (21)**

To a solution of **20** (376.0 mg, 0.986 mmol) in  $\text{CH}_2\text{Cl}_2$  (10 mL) was added  $\text{Rh}_2(\text{OAc})_4$  (4.4 mg, 1.0 mol%), and the resulting mixture was stirred at ambient temperature for 15 min, when TLC indicated the reaction was complete. MeOH (5.0 mL) was added, and  $\text{NaBH}_4$  (111.9 mg, 2.96 mmol) was added portionwise at –40  $^\circ\text{C}$ . The mixture was stirred for 4 h before being quenched with saturated aqueous  $\text{NH}_4\text{Cl}$  solution (10

mL). The organic materials were extracted with EtOAc three times, and the combined organic layer was washed with brine (20 mL), dried over anhydrous  $\text{Na}_2\text{SO}_4$ , and concentrated under reduce pressure to afford the crude residue, which was purified by column chromatography on silica gel eluting with *n*-hexane/ethyl acetate (6/1) to afford **21** (235.0 mg, 67% in 2 steps from **20**) as white solid. Mp. 109.0–112.0 °C;  $^1\text{H}$  NMR (400 MHz,  $\text{CDCl}_3$ ):  $\delta$  7.30 (d,  $J = 8.1$  Hz, 1H), 7.21 (d,  $J = 7.0$  Hz, 1H), 6.76 (dd,  $J_1 = J_2 = 7.8$  Hz, 1H), 5.29–5.24 (m, 1H), 4.38 (dd,  $J_1 = 13.9$  Hz,  $J_2 = 7.0$  Hz, 1H), 4.02 (dd,  $J_1 = J_2 = 8.1$  Hz, 1H), 2.80 (dd,  $J_1 = J_2 = 7.0$  Hz, 1H), 2.38 (ddd,  $J_1 = 13.8$  Hz,  $J_2 = J_3 = 7.0$  Hz, 1H), 2.33 (brs, 1H), 2.14 (ddd,  $J_1 = 13.9$  Hz,  $J_2 = 8.1$  Hz,  $J_3 = 5.2$  Hz, 1H), 2.33 (s, 9H) ppm;  $^{13}\text{C}$  NMR (100 MHz,  $\text{CDCl}_3$ ):  $\delta$  172.2, 156.3, 131.8, 131.2, 123.8, 122.1, 102.7, 85.7, 82.0, 74.4, 48.5, 41.0, 28.1 ppm; IR (Zn/Se-ATR) 3477, 2982, 2899, 1696, 1459  $\text{cm}^{-1}$ ; HRMS ( $\text{ESI}^+$ ) Calcd. for  $\text{C}_{16}\text{H}_{19}\text{BrNaO}_4$  ( $[\text{M}+\text{Na}]^+$ ): 377.0359, Found: 377.0366; HPLC [Chiralpak OJ3, *n*-hexane/2-propanol = 95/5, 1.0 mL/min,  $\lambda = 254$  nm, retention times: (major) 11.7 min (minor) 14.9 min];  $[\alpha]_D^{26} +82.7$  (c 0.70,  $\text{CHCl}_3$ ).

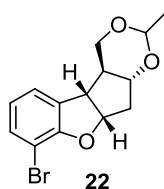

### Acetal (**22**)

To a solution of **21** (467.7 mg, 1.32 mmol) in  $\text{Et}_2\text{O}$  (10 mL) was added  $\text{LiBH}_4$  (86.03 mg, 3.95 mol), and the resulting mixture was stirred at ambient temperature for 15 h. The reaction was quenched with 1 N aqueous HCl solution (20 mL), and the organic materials were extracted with EtOAc three times. The combined extracts were washed with brine (20 mL), dried over anhydrous  $\text{Na}_2\text{SO}_4$ , and concentrated under reduced pressure to afford the crude diol, which was then dissolved in THF (10 mL). To this solution, were added 1,1-diethoxyethane (1.5 mL, 10.5 mmol) and *p*-TsOH $\cdot\text{H}_2\text{O}$  (25.2 mg, 10 mol %), and the reaction mixture was stirred at 60 °C for 3 h, before being quenched with saturated aqueous  $\text{NaHCO}_3$  solution (10 mL). The product was extracted with EtOAc three times, and the combined extracts were washed with brine (10 mL), dried over anhydrous  $\text{Na}_2\text{SO}_4$ , and evaporated to give the resulting crude residue, which was purified by column chromatography on silica gel eluting with *n*-hexane/ethyl acetate (8/1) to afford **22** (283.2 mg, 69% in 2 steps from **21**) as colorless oil.  $^1\text{H}$  NMR (400 MHz,  $\text{CDCl}_3$ ):  $\delta$  7.31 (d,  $J = 8.2$  Hz, 1H), 7.02 (d,  $J = 7.3$  Hz, 1H), 6.74 (dd,  $J_1 = J_2 = 7.6$  Hz, 1H), 5.22 (td,  $J_1 = 7.9$  Hz,  $J_2 = 7.5$  Hz, 1H), 4.73 (q,  $J = 5.0$  Hz, 1H), 4.39 (dd,  $J_1 = 10.5$  Hz,  $J_2 = 4.6$  Hz, 1H), 3.73 (dd,  $J_1 = J_2 = 10.5$  Hz, 1H), 3.42 (td,  $J_1 = 11.2$ ,  $J_2 = 6.1$  Hz, 1H), 3.26 (dd,  $J_1 = 11.0$  Hz,  $J_2 = 9.2$  Hz, 1H), 2.78 (ddd,  $J_1 = 13.0$  Hz,  $J_2 = J_3 = 6.5$  Hz, 1H), 2.06 (td,  $J_1 = 12.1$  Hz,  $J_2 = 6.0$  Hz, 1H), 1.88 (ddd,  $J_1 = 12.9$  Hz,  $J_2 = 7.5$  Hz,  $J_3 = 5.2$  Hz, 1H), 1.36 (d,  $J = 5.0$  Hz, 3H) ppm;  $^{13}\text{C}$  NMR (126 MHz,  $\text{CDCl}_3$ ):  $\delta$  156.4, 131.8, 130.2, 123.0, 122.0, 102.9, 99.6, 84.4, 79.4, 70.6, 48.1, 46.0, 37.7, 20.6 ppm; IR (Zn/Se-ATR) 2990, 1451, 1388  $\text{cm}^{-1}$ ; HRMS ( $\text{ESI}^+$ ) Calcd. for  $\text{C}_{12}\text{H}_{13}\text{NaO}_3\text{Br}$  ( $[\text{M}-\text{C}_2\text{H}_2+\text{Na}]^+$ ): 306.9940, Found: 306.9925;  $[\alpha]_D^{26} +43.0$  (c 0.98,  $\text{CHCl}_3$ ).

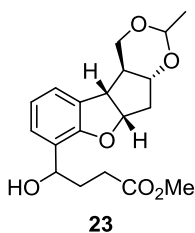

### Ester **23**

To a solution of the acetal **22** (76.7 mg, 0.246 mmol) in THF (2.5 mL) was added TMEDA (0.04 mL 0.32 mmol) at  $-78\text{ }^{\circ}\text{C}$ , and the reaction mixture was stirred for 10 minutes. To this solution was added a *n*-hexane solution of *n*-BuLi (1.55 M, 0.2 mL, 0.3 mmol) at  $-78\text{ }^{\circ}\text{C}$ , and the mixture stirred at the same temperature for 5 minutes before the subsequent dropwise addition of 3-formylpropionate (85.7 mg, 0.738 mmol) in THF (1.0 mL) over 5 minutes. The reaction mixture was stirred at  $-78\text{ }^{\circ}\text{C}$  for 30 min, and quenched with saturated aqueous  $\text{NH}_4\text{Cl}$  solution (3.0 mL). The organic materials were extracted with EtOAc three times, and the combined extracts were washed with brine (5 mL), dried over anhydrous  $\text{Na}_2\text{SO}_4$ , and concentrated under reduced pressure to give crude ester. The residue was purified by column chromatography on silica gel eluting with *n*-hexane/ethyl acetate (2/1) to afford **23** (49.8 mg, 58%) as colorless oil.  $^1\text{H}$  NMR (400 MHz,  $\text{CDCl}_3$ ):  $\delta$  7.15 (d,  $J = 7.8\text{ Hz}$ , 1H), 7.06 (d,  $J = 7.3\text{ Hz}$ , 1H), 6.74 (t,  $J = 7.3\text{ Hz}$ , 1H), 5.16 (q,  $J = 7.2\text{ Hz}$ , 1H), 4.80 (q,  $J = 6.0\text{ Hz}$ , 1H), 4.73 (q,  $J = 4.9\text{ Hz}$ , 1H), 4.39 (dd,  $J_1 = 10.5\text{ Hz}$ ,  $J_2 = 4.1\text{ Hz}$ , 1H), 3.73 (t,  $J = 10.8\text{ Hz}$ , 1H), 3.67 (s, 3H), 3.43 (td,  $J_1 = 11.2$ ,  $J_2 = 6.4\text{ Hz}$ , 1H), 3.16 (t,  $J = 9.8\text{ Hz}$ , 1H), 2.78–2.70 (m, 2H), 2.45 (q,  $J = 6.8\text{ Hz}$ , 2H), 2.11 (ddd,  $J_1 = 13.6\text{ Hz}$ ,  $J_2 = J_3 = 6.8\text{ Hz}$ , 1H), 1.96 (td,  $J_1 = 12.1\text{ Hz}$ ,  $J_2 = 5.8\text{ Hz}$ , 1H), 1.82 (qd,  $J_1 = 10.8\text{ Hz}$ ,  $J_2 = 4.1\text{ Hz}$ , 1H), 1.69 (d,  $J = 6.8\text{ Hz}$ , 1H), 1.36 (d,  $J = 4.8\text{ Hz}$ , 3H) ppm;  $^{13}\text{C}$  NMR (101 MHz,  $\text{CDCl}_3$ ):  $\delta$  174.3, 155.7, 129.0, 126.2, 125.9, 123.1, 120.9, 99.6, 84.3, 79.5, 70.7, 70.2, 51.6, 48.2, 44.8, 37.9, 32.1, 30.4, 20.6 ppm; IR (Zn/Se-ATR) 3461, 2949, 1732, 1450  $\text{cm}^{-1}$ ; HRMS ( $\text{ESI}^+$ ) Calcd. for  $\text{C}_{19}\text{H}_{24}\text{NaO}_6$  ( $[\text{M}+\text{Na}]^+$ ): 371.1465, Found: 371.1477;  $[\alpha]_D^{26} +31.4$  ( $c$  0.67,  $\text{CHCl}_3$ ).

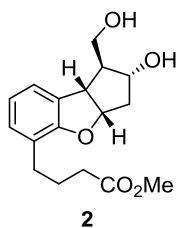

### Methyl 4-((1*S*,2*R*,3*aS*,8*bS*)-2-Hydroxy-1-(hydroxymethyl)-2,3,3*a*,8*b*-tetrahydro-1*H*-cyclopenta- $\beta$ -benzofuran-5-yl)butanoate (**2**) [4]

To the solution of **23** (103.5 mg 0.297 mmol) in wet MeOH (5.0 mL) was added pyridinium *p*-toluenesulfonate (PPTS, 630.0 mg 2.51 mmol) at  $0\text{ }^{\circ}\text{C}$ , and the reaction mixture was stirred at room temperature for 3 h. The organic materials were extracted with EtOAc three times, and the combined extracts were washed with brine (5 mL), dried over anhydrous  $\text{Na}_2\text{SO}_4$ , and evaporated to give the crude diol, which was then dissolved in  $\text{CH}_2\text{Cl}_2$  (4.0 mL). To this solution were added  $\text{Et}_3\text{SiH}$  (0.5 mL, 3.13

mmol) and TFA (0.1 mL 1.35 mmol) at 0 °C dropwise, and the reaction mixture was stirred at 0 °C for 1.5 h, before being quenched with saturated aqueous NaHCO<sub>3</sub> solution (3.0 mL). The organic materials were extracted with EtOAc three times, and the combined extracts were washed with brine, dried over anhydrous Na<sub>2</sub>SO<sub>4</sub>, and concentrated under reduced pressure to afford crude **2**, which was then purified by preparative thin layer chromatography on silica gel with *n*-hexane/ethyl acetate (1/4) as eluent to afford key intermediate **2** (33.7 mg 37% in 2 steps from **23**) as white solid. Mp. 51.6–55.6 °C; <sup>1</sup>H NMR (400 MHz, CDCl<sub>3</sub>): δ 7.02 (d, *J* = 7.3 Hz, 1H), 6.95 (d, *J* = 7.3 Hz, 1H), 6.79 (t, *J* = 7.3 Hz, 1H), 5.13 (ddd, *J*<sub>1</sub> = 8.8 Hz, *J*<sub>2</sub> = 7.2 Hz, *J*<sub>3</sub> = 4.8 Hz, 1H), 4.13 (q, *J* = 6.9 Hz, 1H), 3.97 (dd, *J*<sub>1</sub> = 10.3 Hz, *J*<sub>2</sub> = 5.3 Hz, 1H), 3.79 (t, *J* = 9.2 Hz, 1H), 3.65 (s, 3H), 3.42 (t, *J* = 8.0 Hz, 1H), 2.55–2.65 (m, 3H), 2.32 (t, *J* = 7.3 Hz, 2H), 2.17 (ddd, *J*<sub>1</sub> = 13.4 Hz, *J*<sub>2</sub> = *J*<sub>3</sub> = 6.7 Hz, 1H), 2.05 (ddd, *J*<sub>1</sub> = 13.2 Hz, *J*<sub>2</sub> = 8.0 Hz, *J*<sub>3</sub> = 5.2 Hz, 1H), 1.90–2.01 (m, 2H), 1.58–1.62 (brs, 2H) ppm; <sup>13</sup>C NMR (101 MHz, CDCl<sub>3</sub>): δ 174.2, 157.1, 130.2, 128.9, 123.4, 122.0, 120.7, 85.4, 75.9, 64.9, 56.8, 51.5, 47.5, 41.9, 33.4, 29.2, 24.8 ppm; IR (Zn/Se-ATR) 3383, 2929, 1728, 1453 cm<sup>-1</sup>; HRMS (ESI<sup>+</sup>) Calcd. for C<sub>17</sub>H<sub>22</sub>NaO<sub>5</sub> ([M+Na]<sup>+</sup>): 329.1359, Found: 329.1367; HPLC [Chiralpak AD, *n*-hexane/2-propanol = 95/5, 1.0 mL/min, λ = 238 nm, retention times: (major) 42.8 min (minor) 38.3 min]; [α]<sub>D</sub><sup>26</sup> +12.5 (*c* 1.25, CHCl<sub>3</sub>) for 95% ee.

### 3. Reference

- (1) Deping, C.; Kevin, D. J.; Duke, F. M.; Antony, S. N.; Rosanna, T.; Kenneth, W. J.; Michael, Z. N. *Eur. Pat. Appl.* W52313, 2004.
- (2) Mitchell, J. M.; Finney, N. S. *Tetrahedron Lett.* **2000**, *41*, 8431.
- (3) Hintermann, L.; Ackerstaff, J.; Boeck, F. *Chem. Eur. J.* **2013**, *19*, 2311
- (4) Reddy, N. K.; Vijaykumar, B. V. D.; Chandrasekhar, S. *Org. Lett.* **2012**, *14*, 299.

#### 4. Copies of $^1\text{H}$ and $^{13}\text{C}$ NMR charts

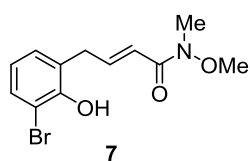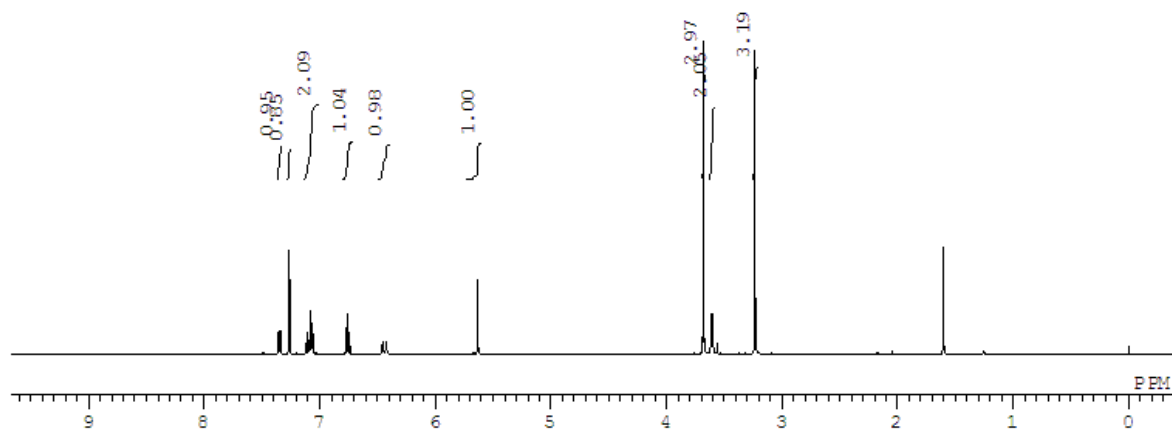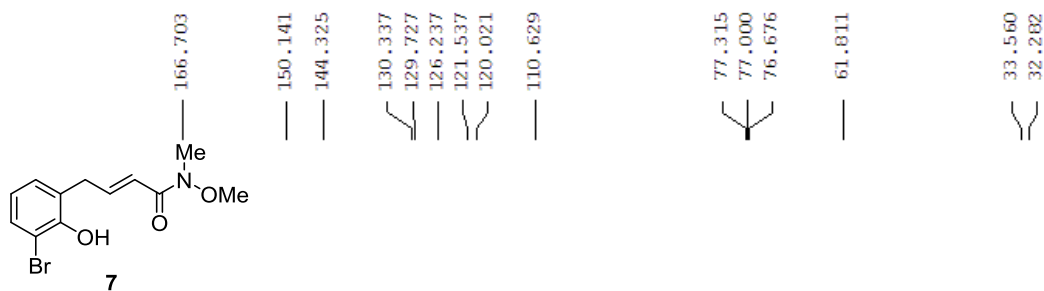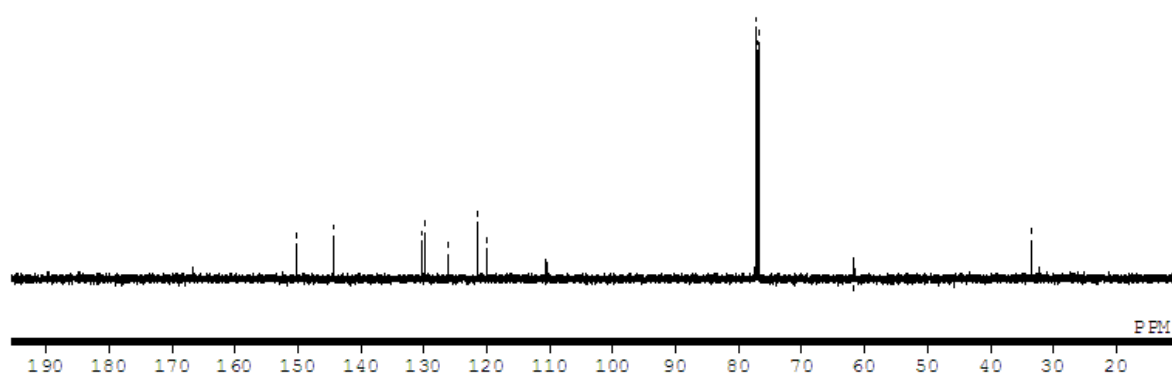

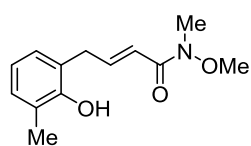

**8**

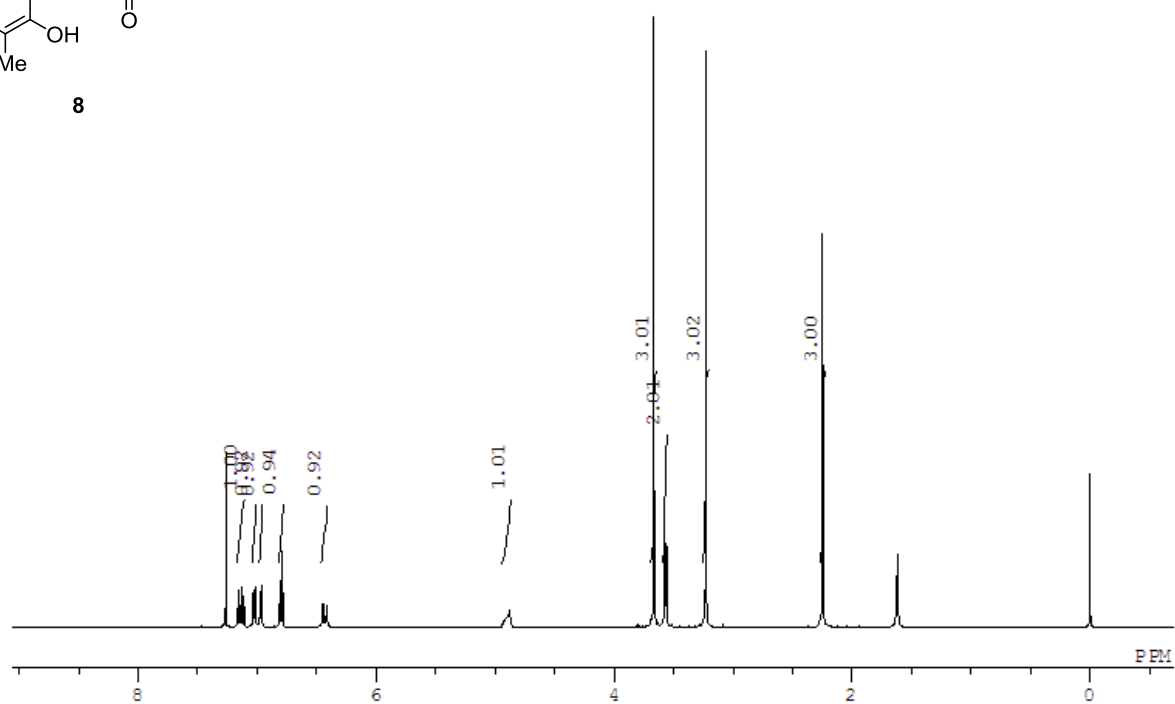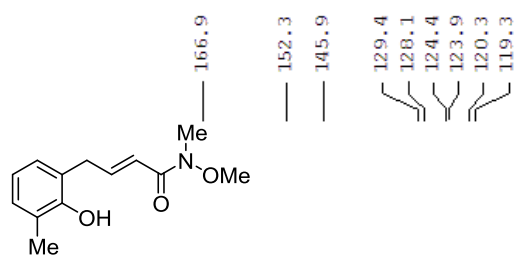

**8**

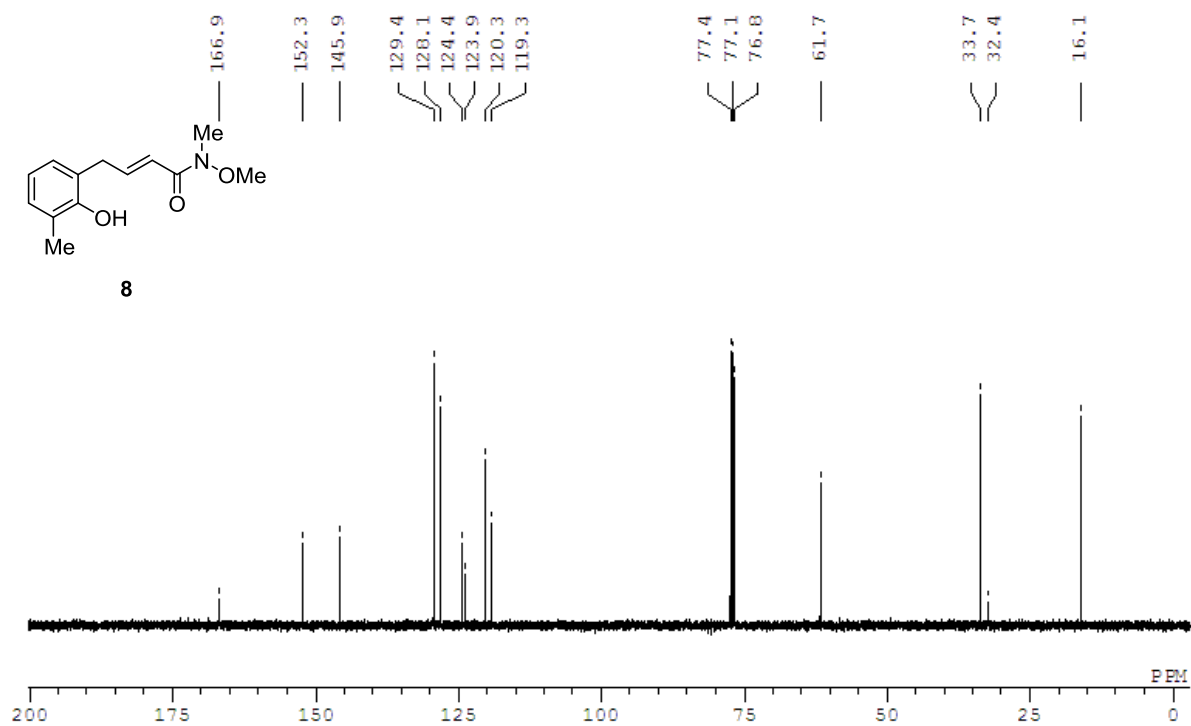

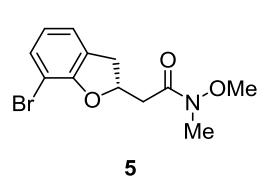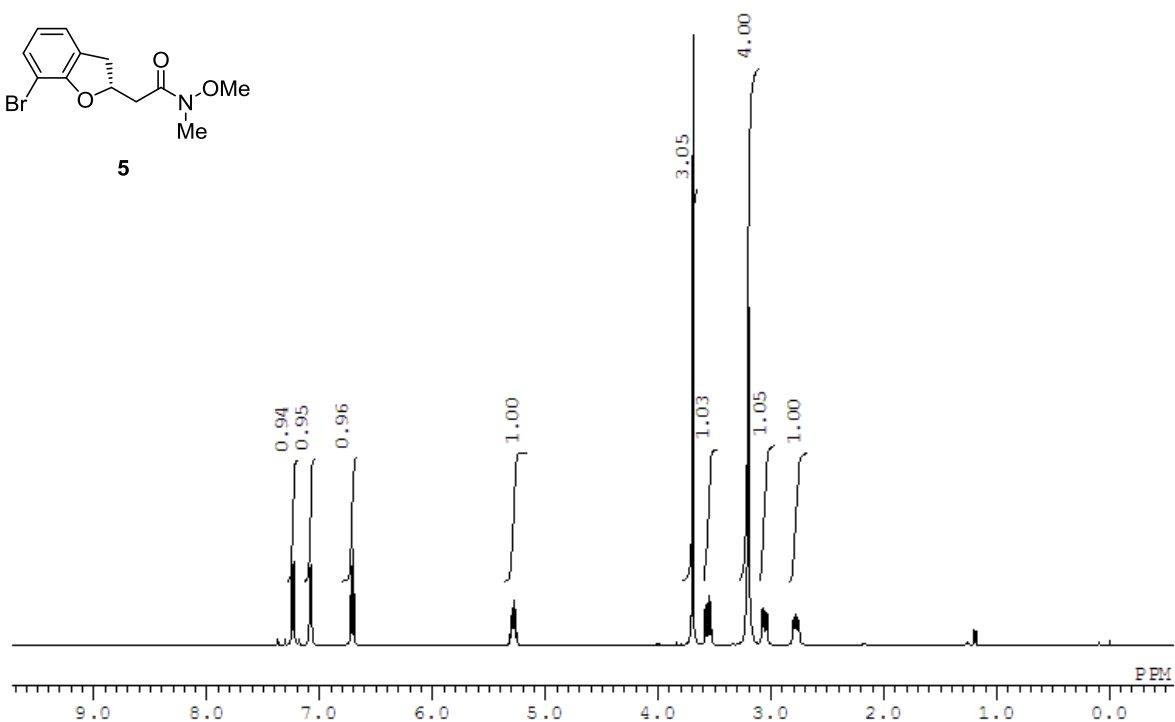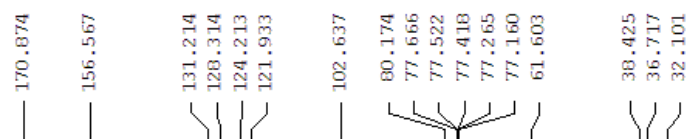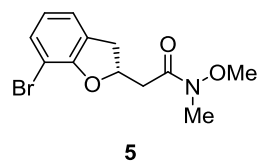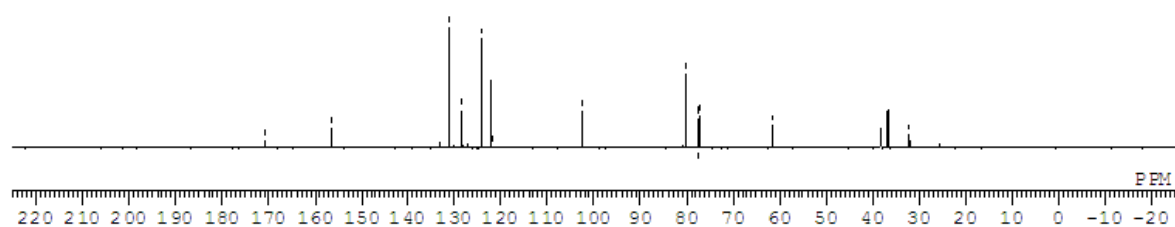



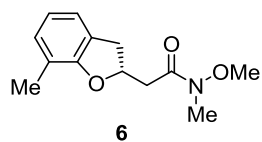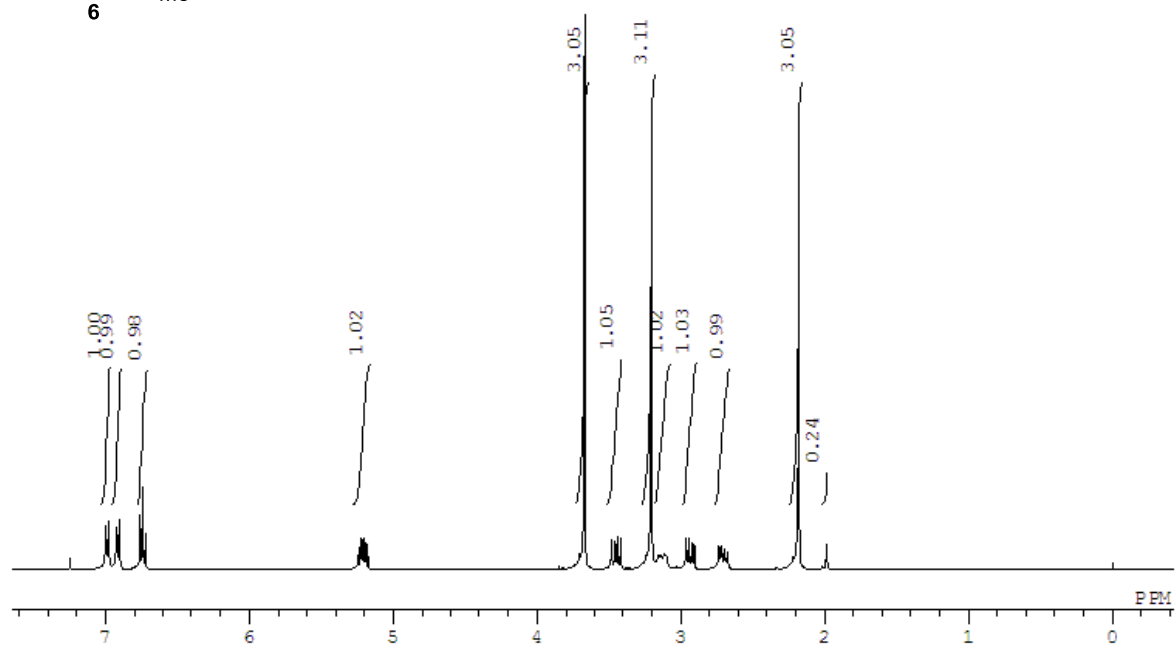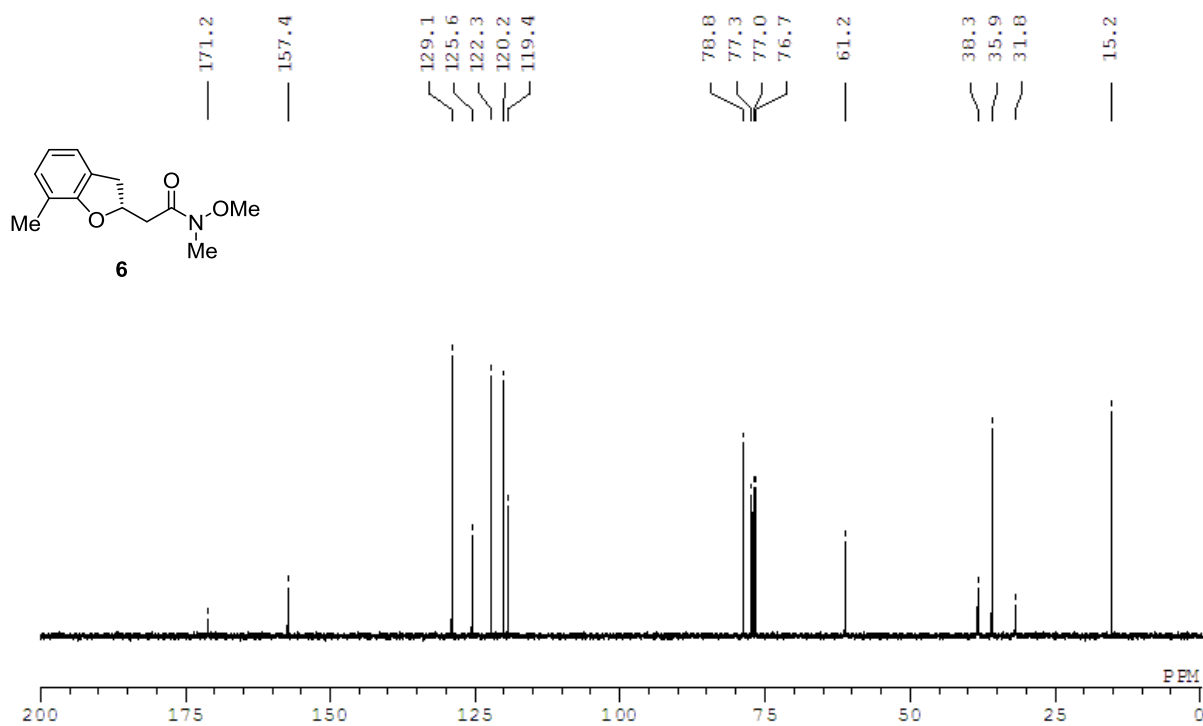

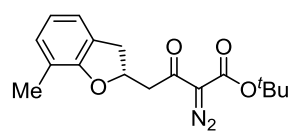

14

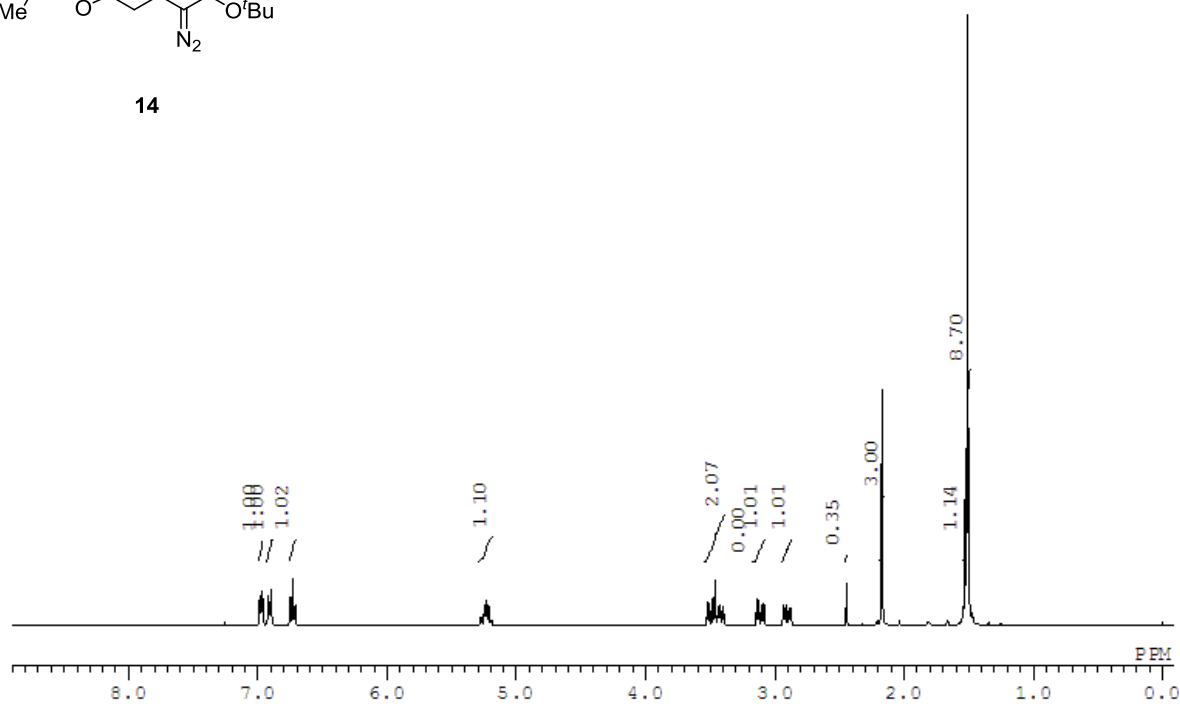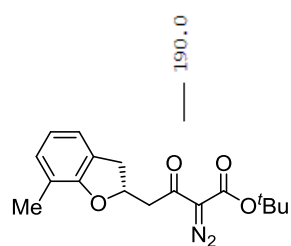

14

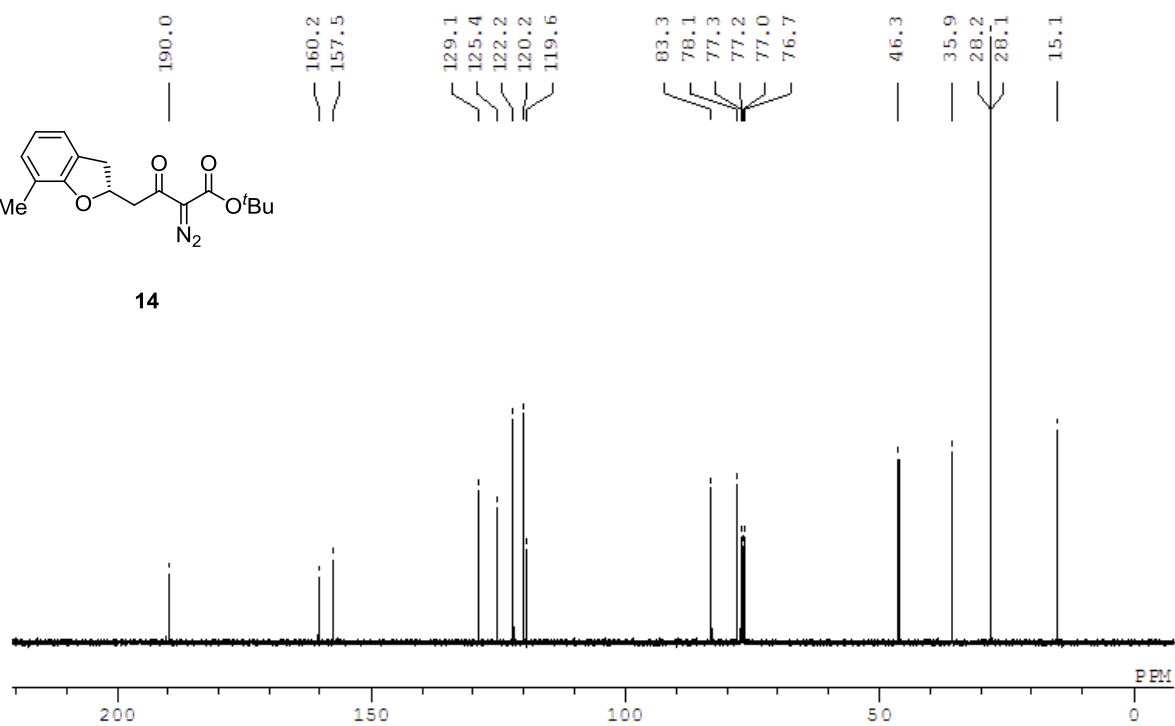

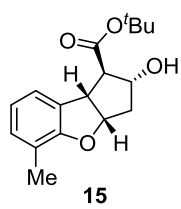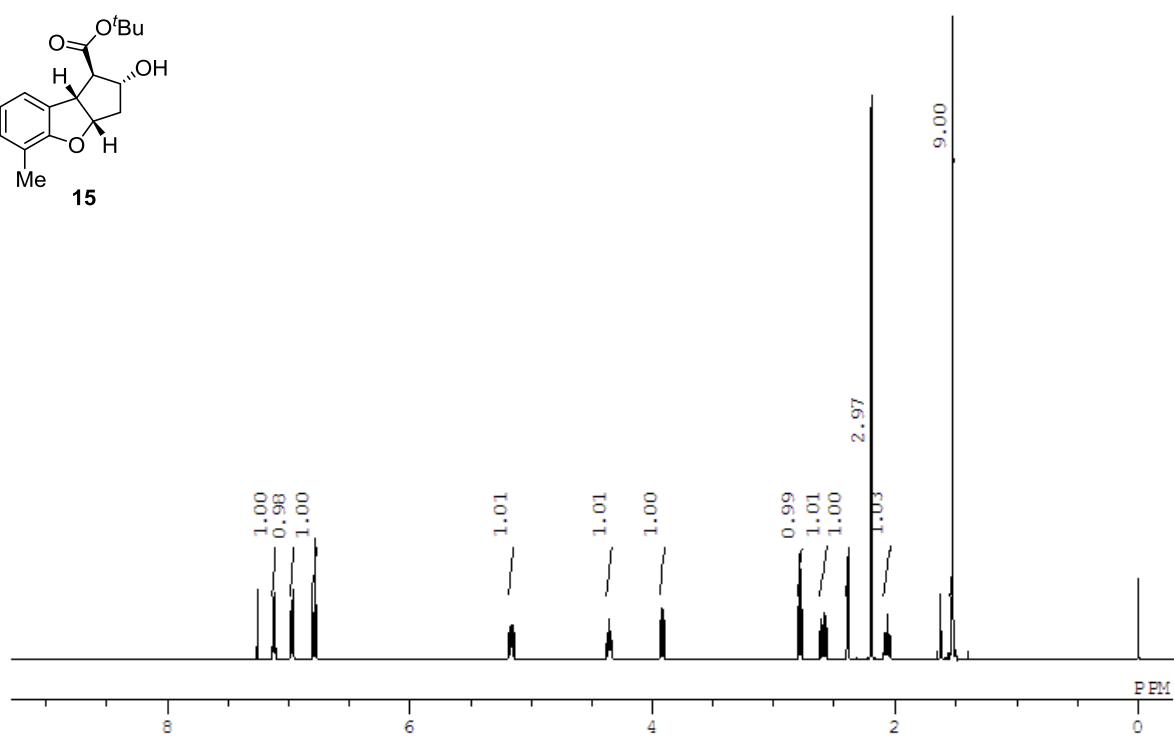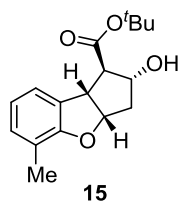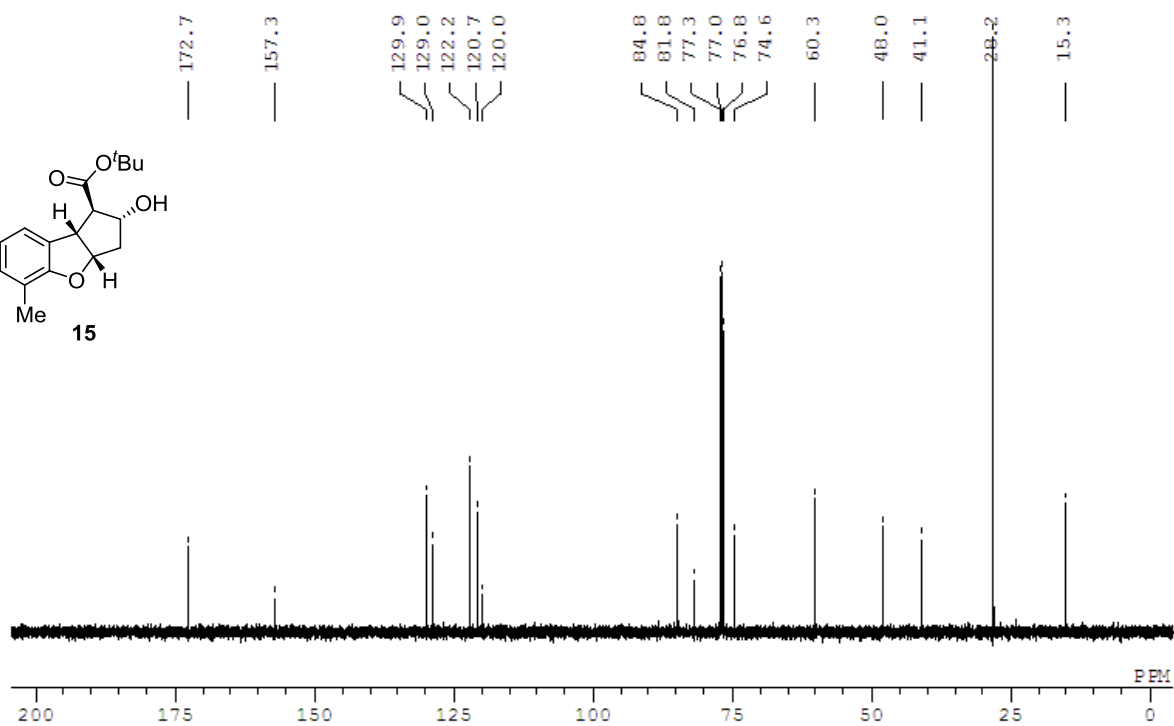

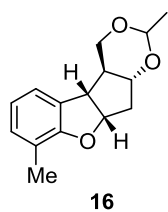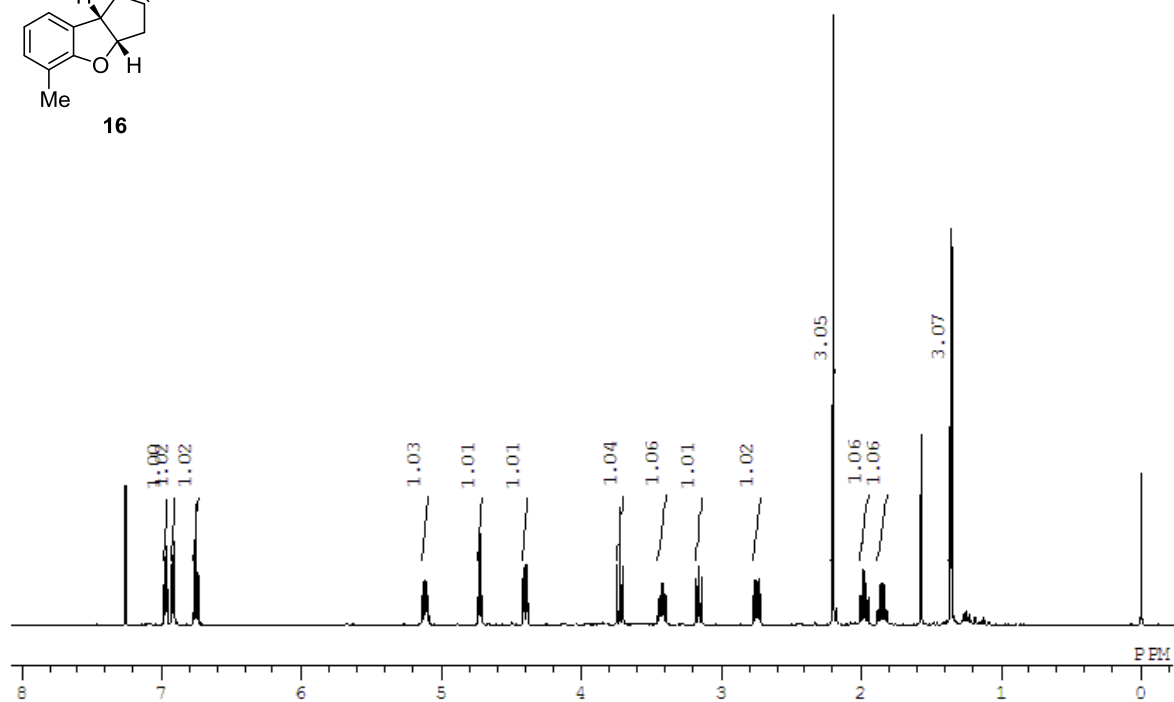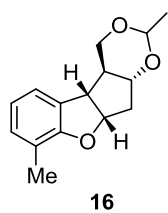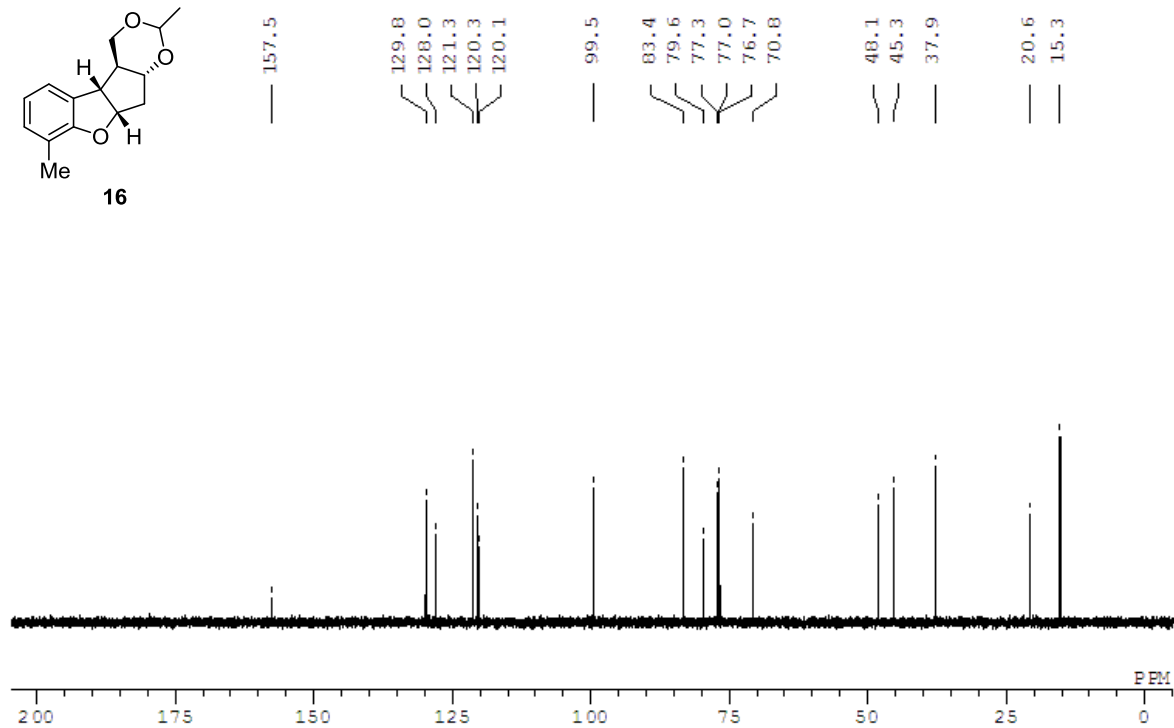

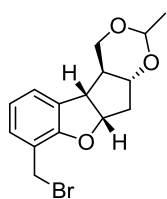

17

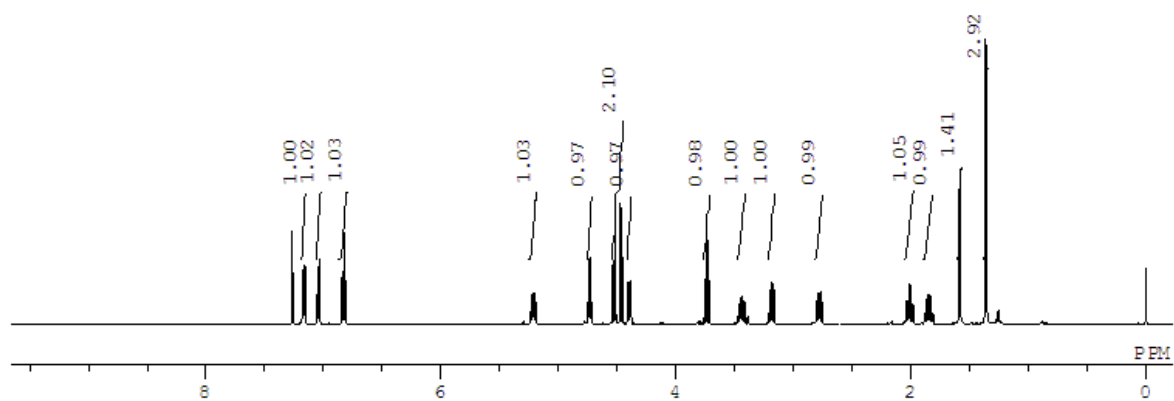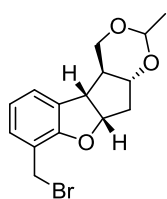

17

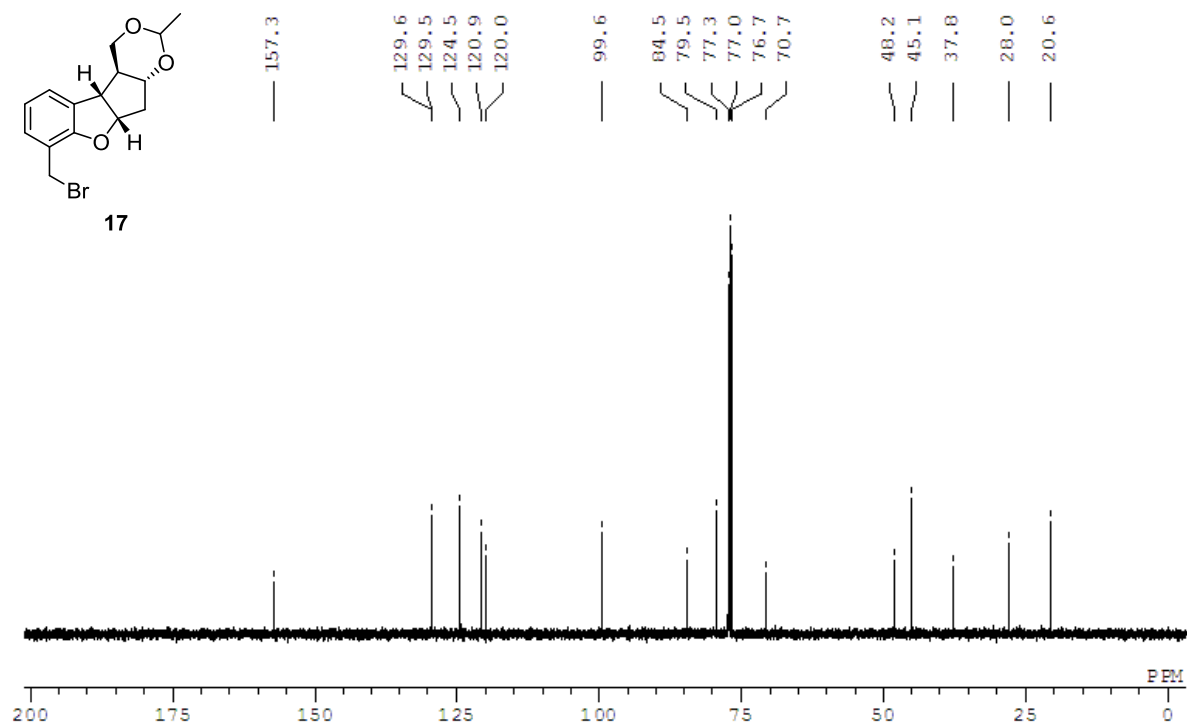

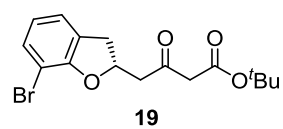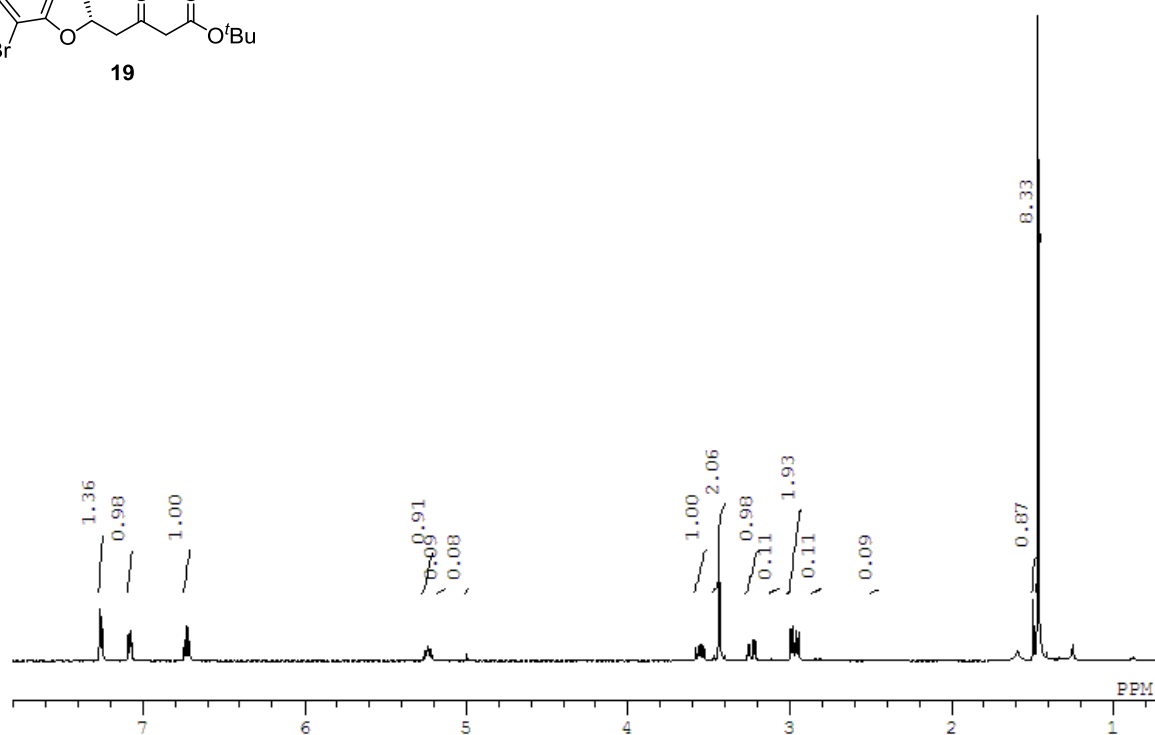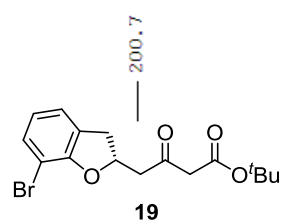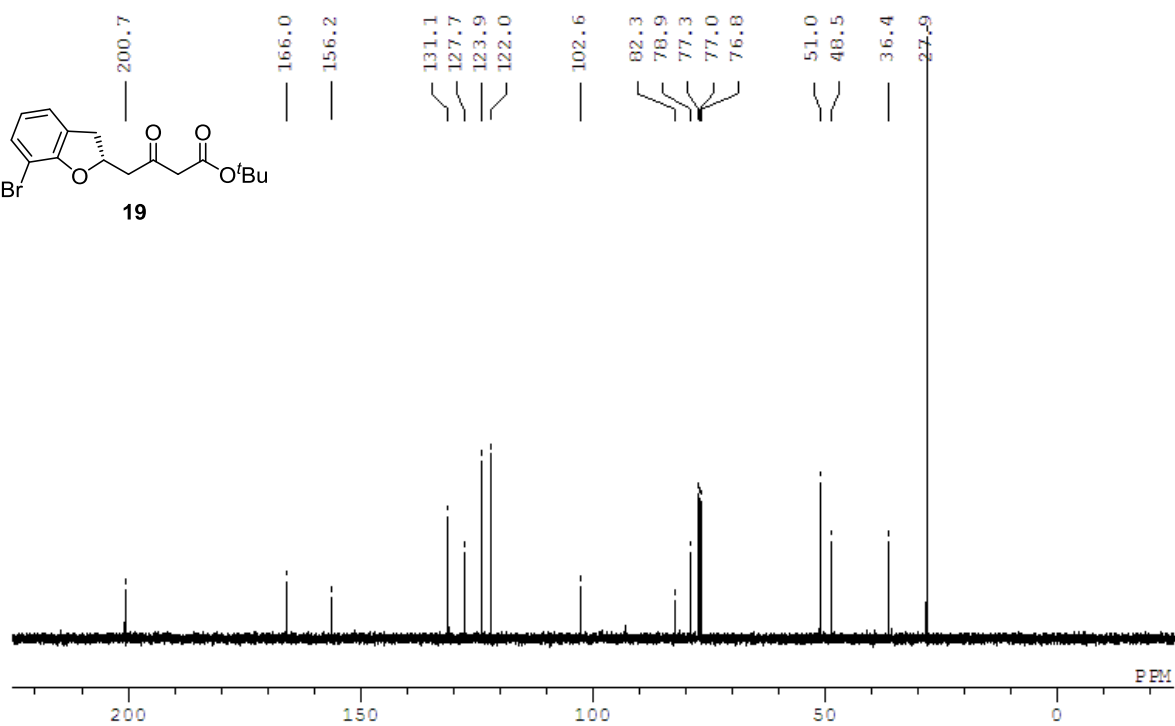

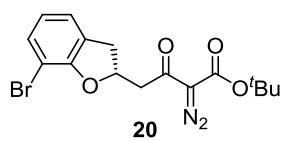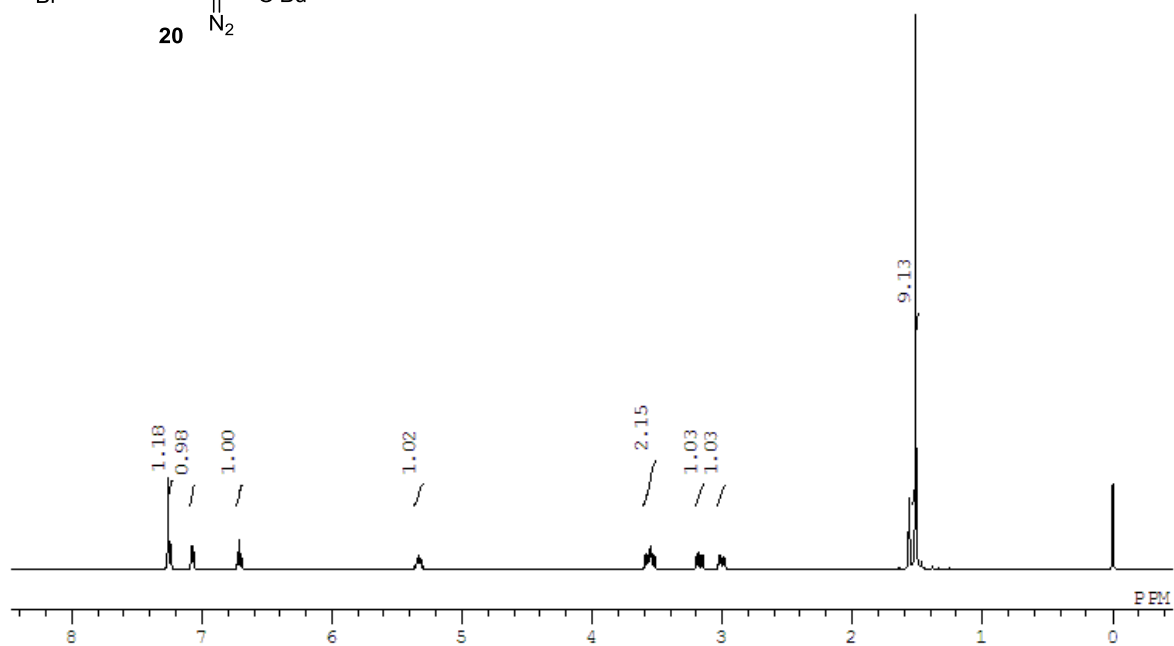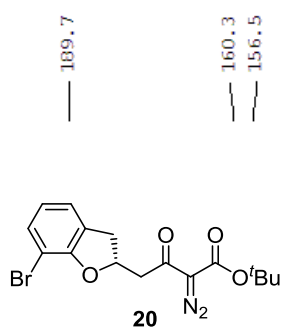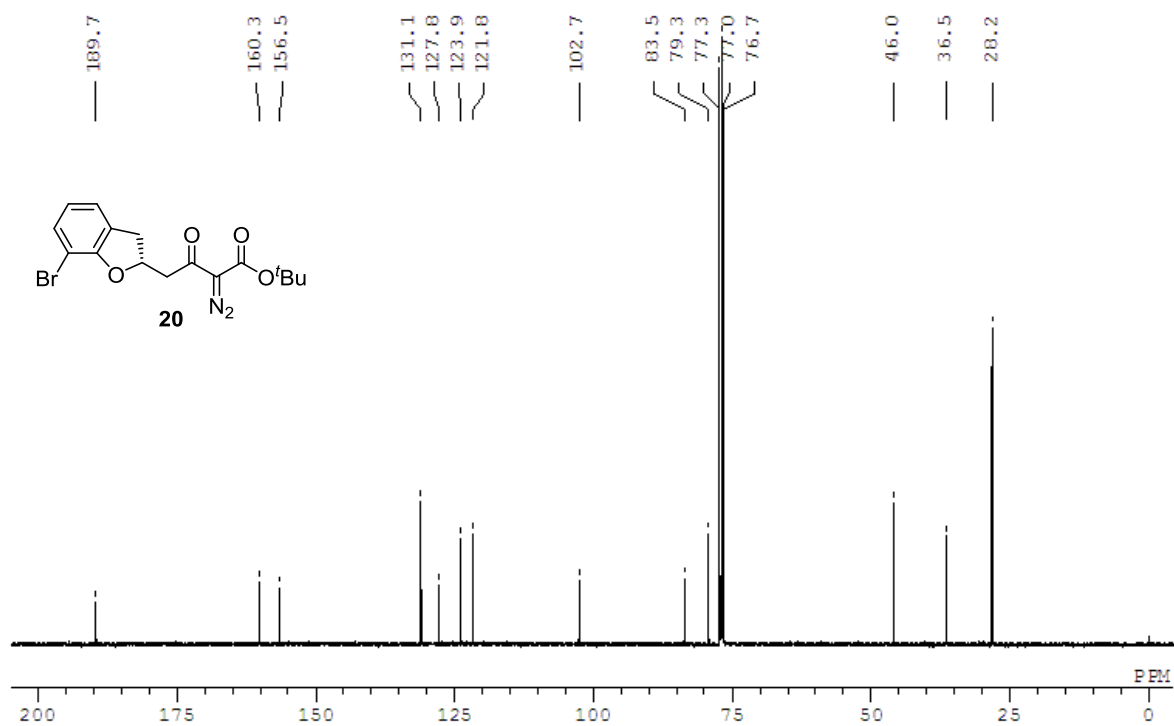

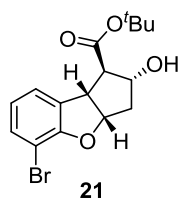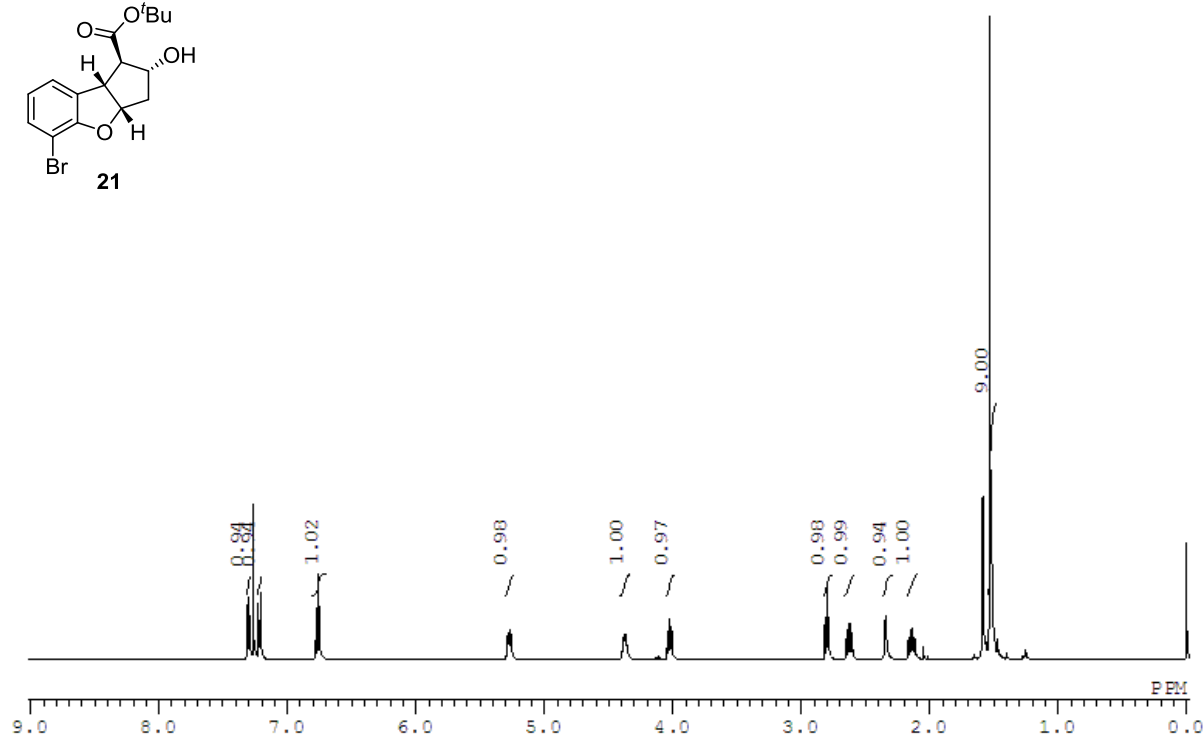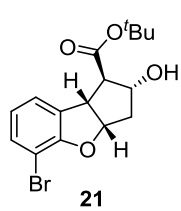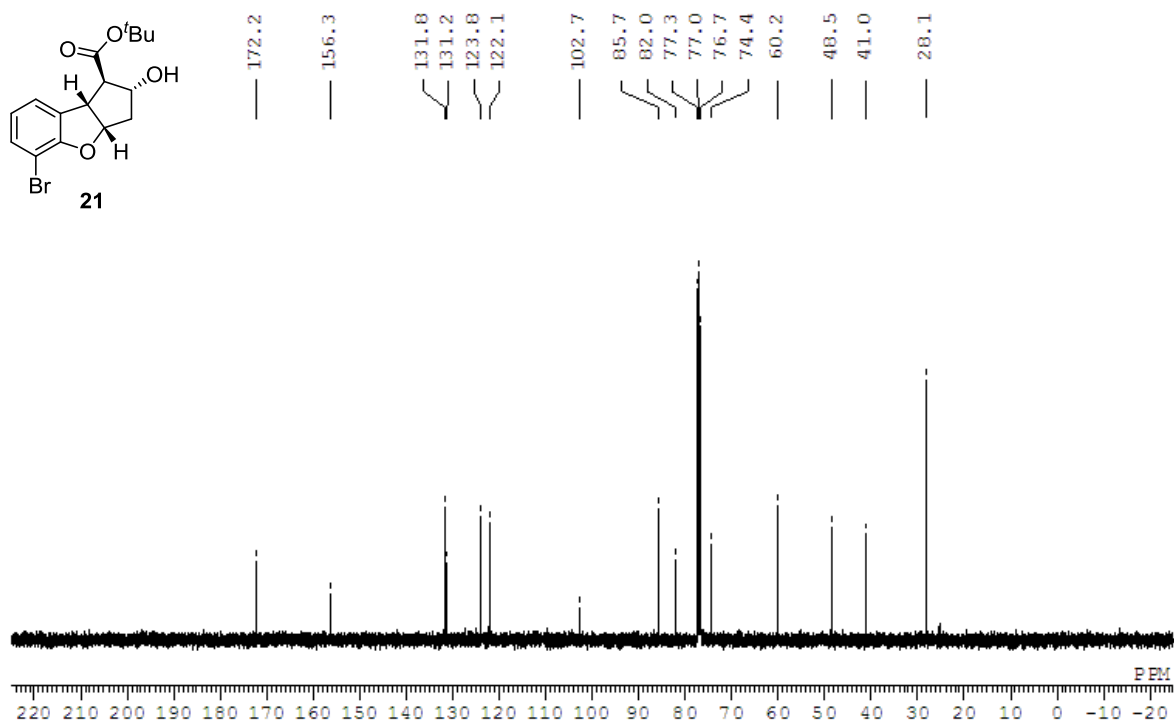



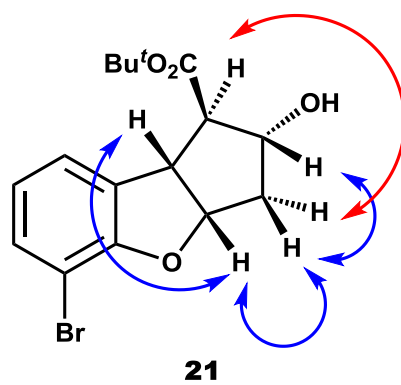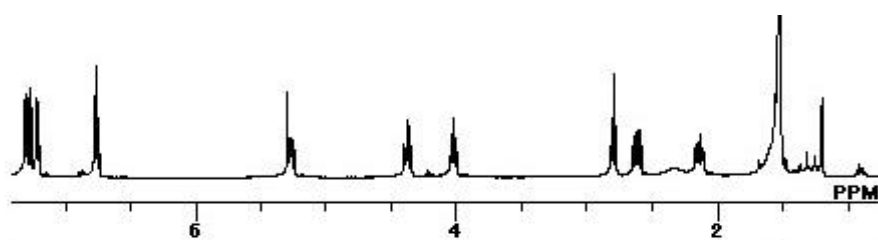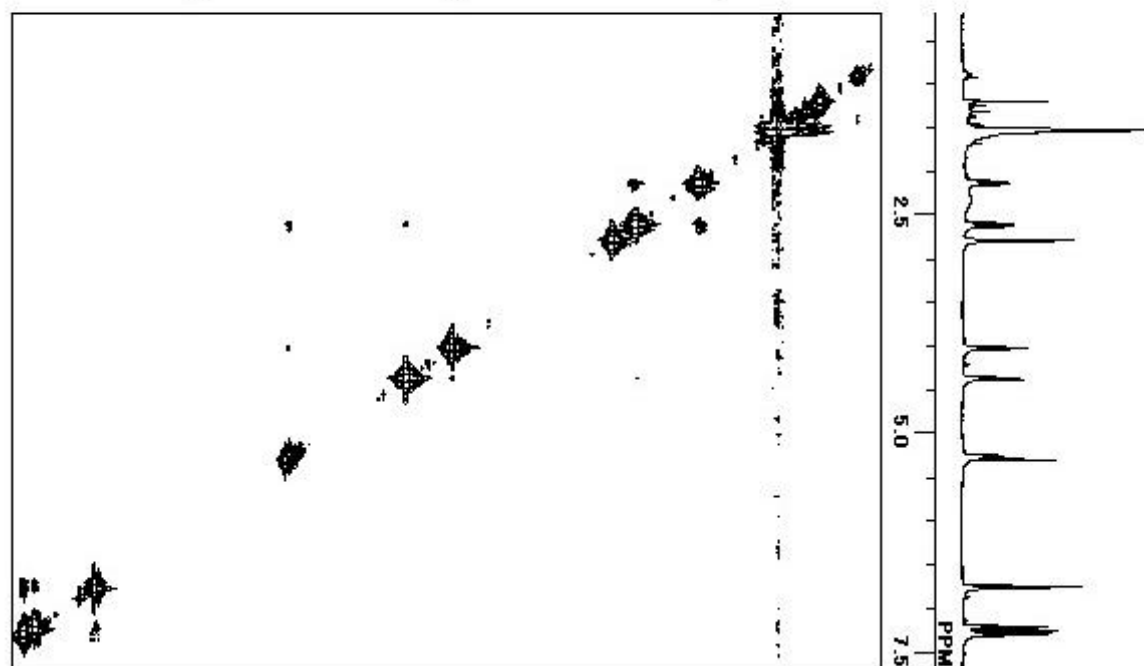

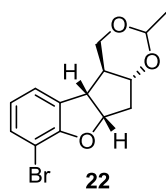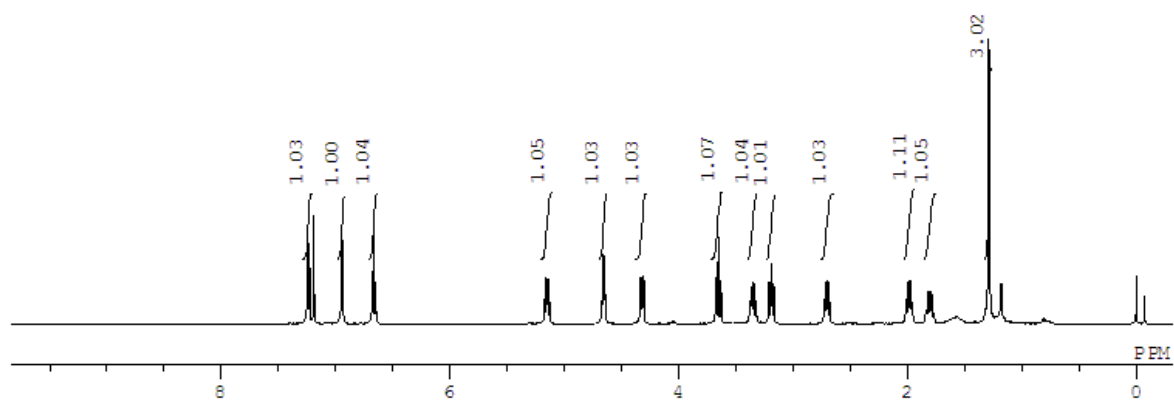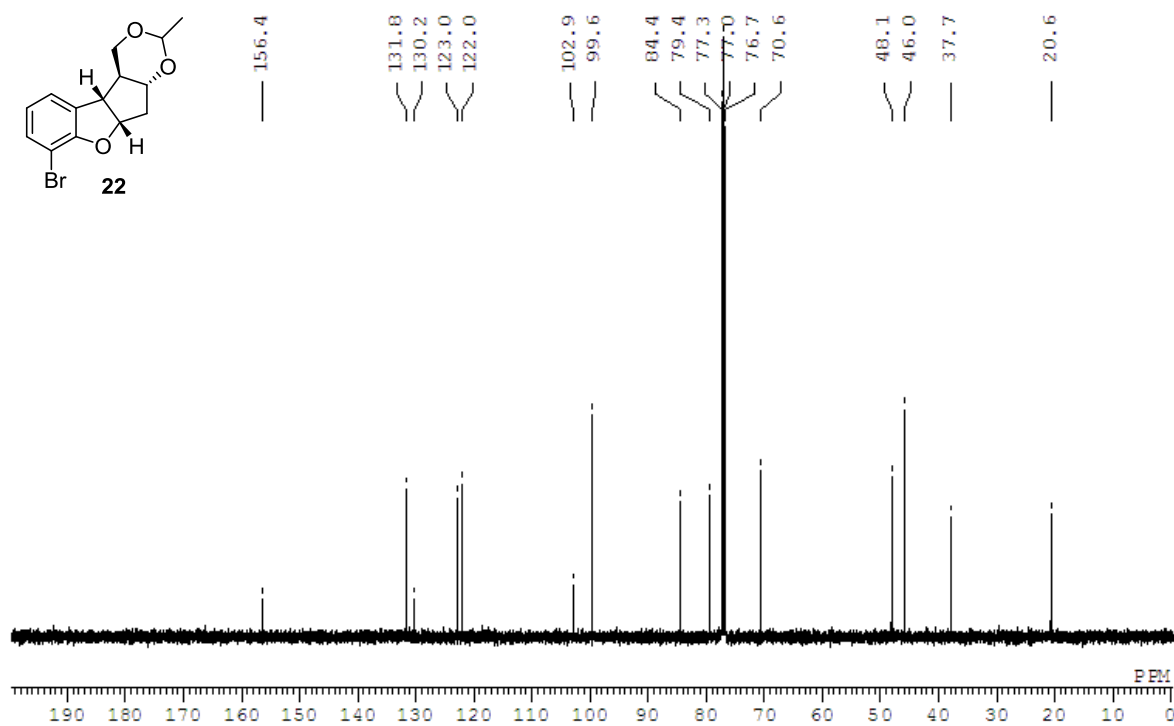

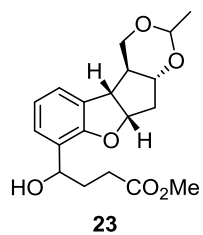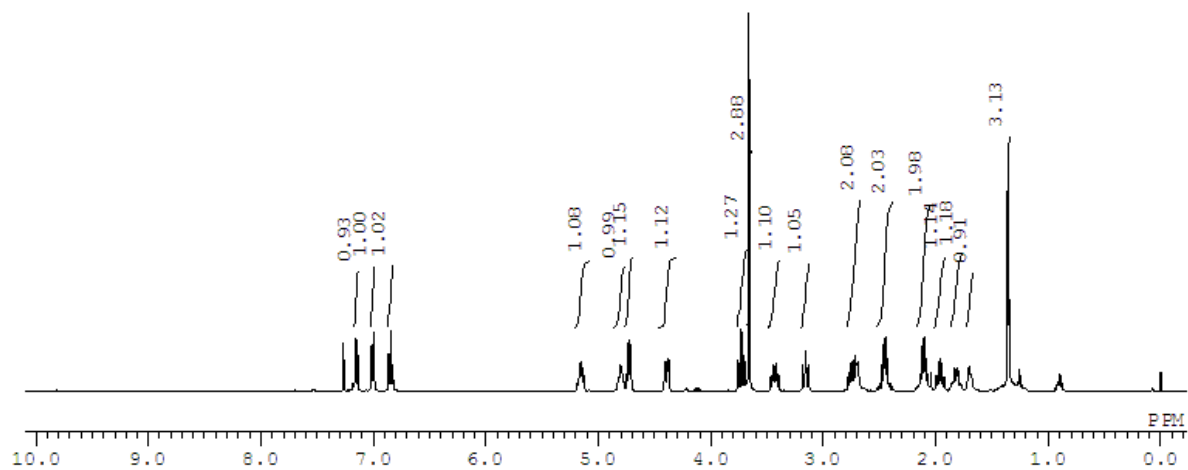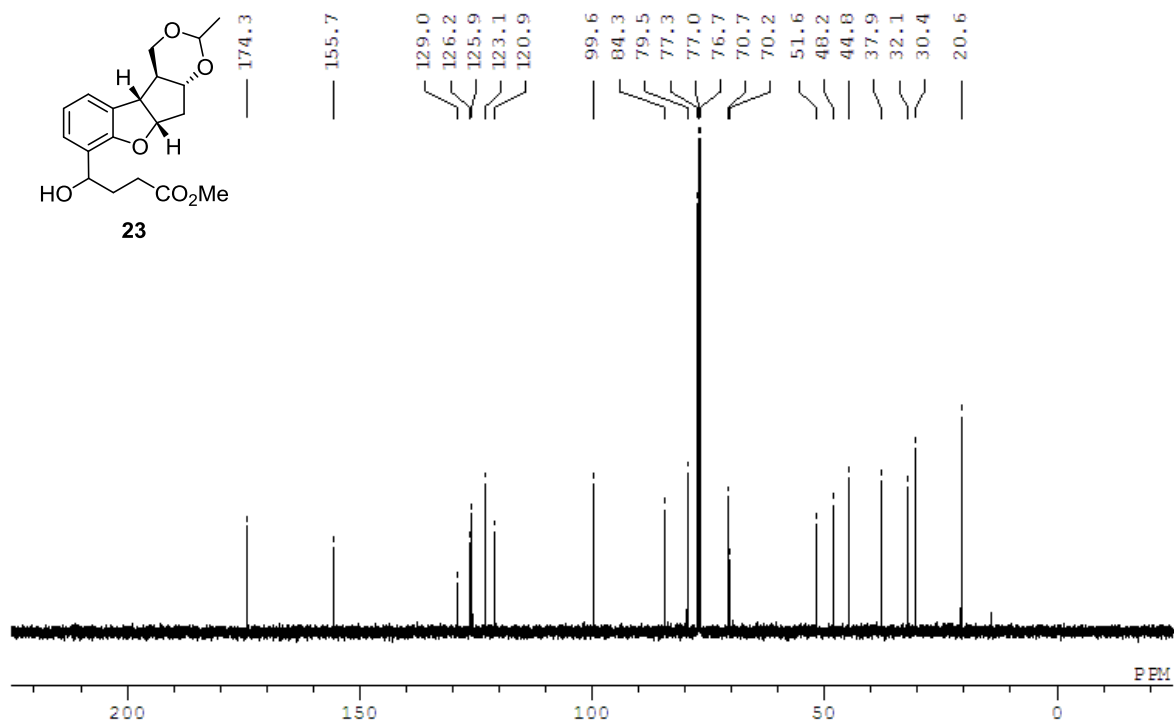

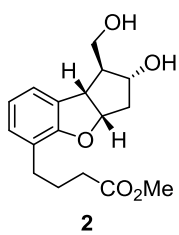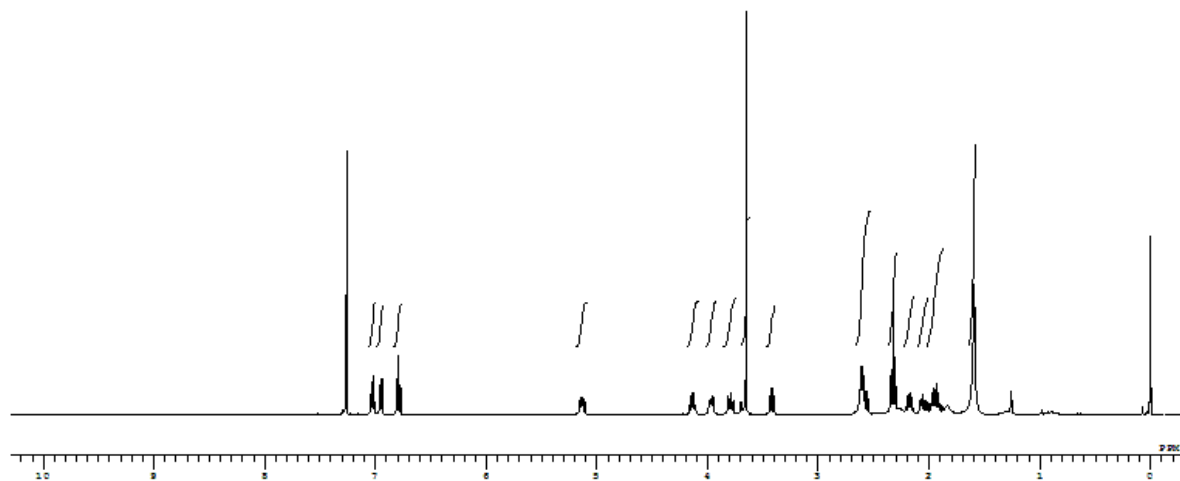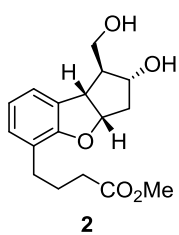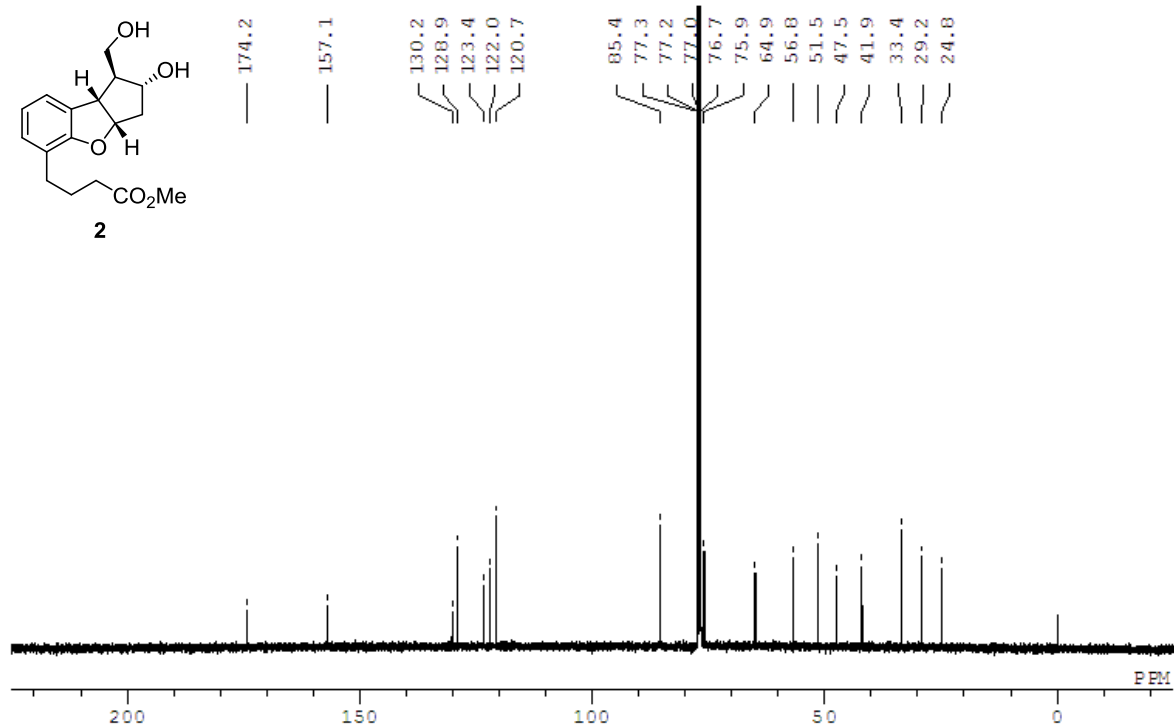

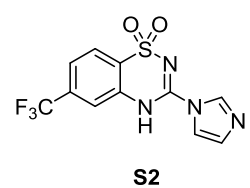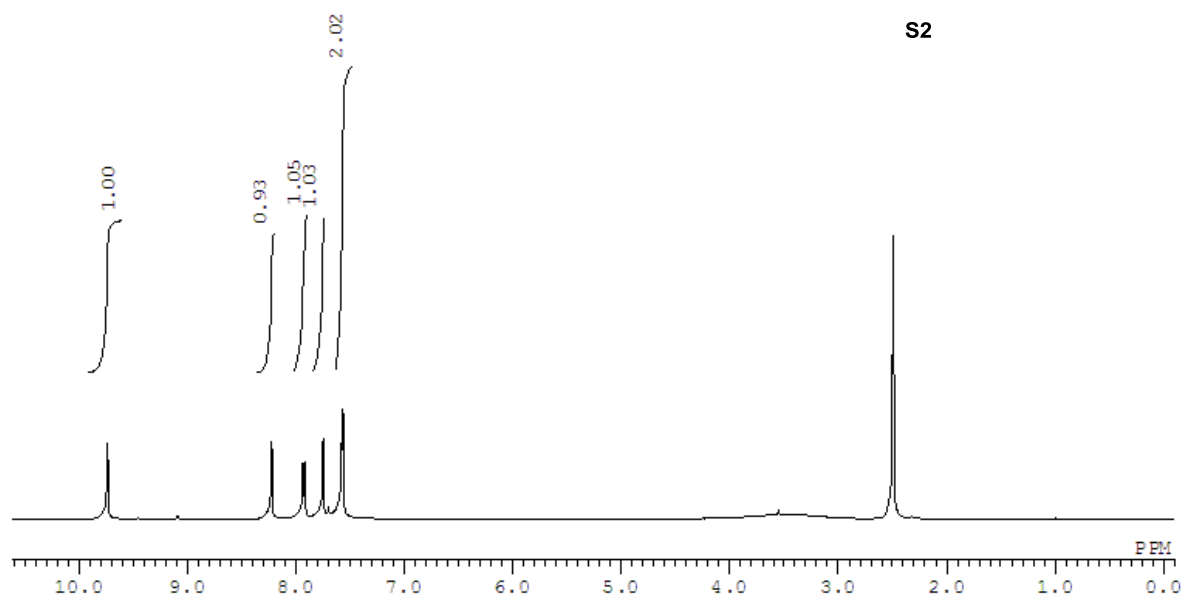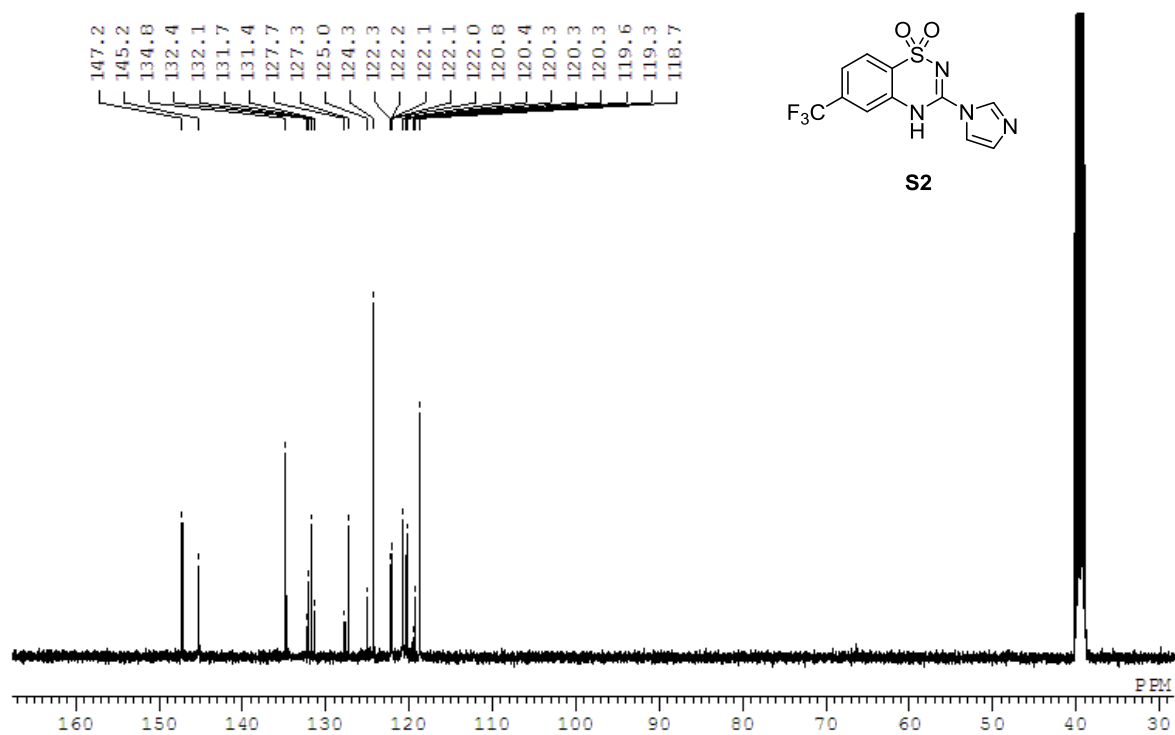

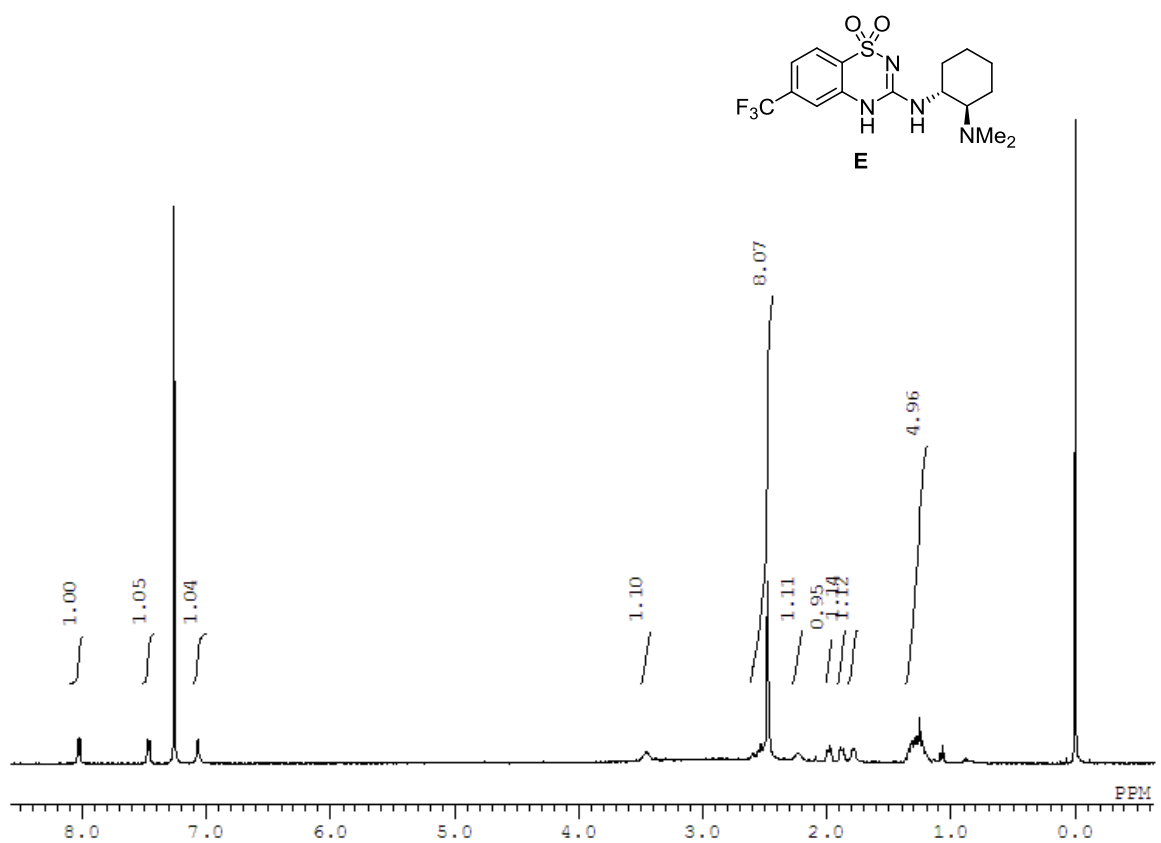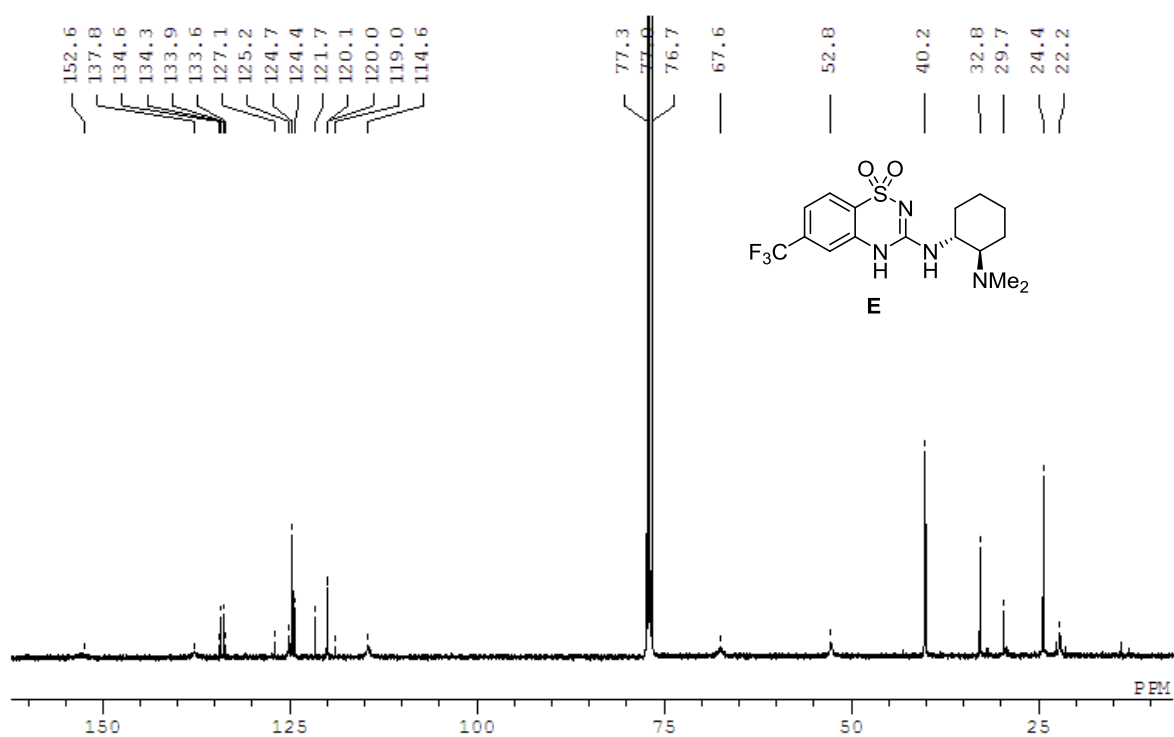

## 5. Copies of HPLC charts

### ==== Shimadzu LCsolution Analysis Report ====

sample ID : 10  
 method name : 1.0-95-auto-shoki10-4-4.lcm  
 acquisition date : 2013/05/01 11:46:30  
 modified date : 2013/06/29 18:47:31

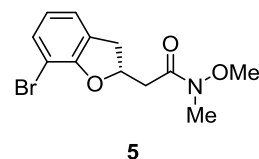

#### <Chromatogram>

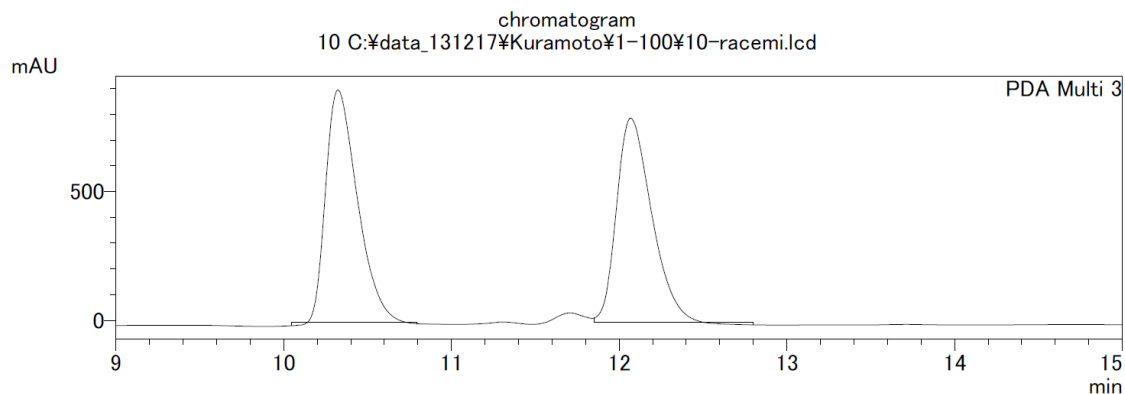

1 PDA Multi 3 / 220nm 4nm

#### <Peak Report>

peak table C:\data\_131217\Kuramoto\1-100\10-racemi.lcd

PDA Ch3 220nm 4nm

| peak # | retention time (min) | area     | area (%) |
|--------|----------------------|----------|----------|
| 1      | 10.318               | 11710592 | 50.834   |
| 2      | 12.064               | 11326264 | 49.166   |

### ==== Shimadzu LCsolution Analysis Report ====

sample ID : 136(10)  
 method name : 95-IPA5-4.4-auto-shoki-30min.lcm  
 acquisition date : 2013/12/04 20:16:06  
 modified date : 2013/12/04 21:58:40

#### <Chromatogram>

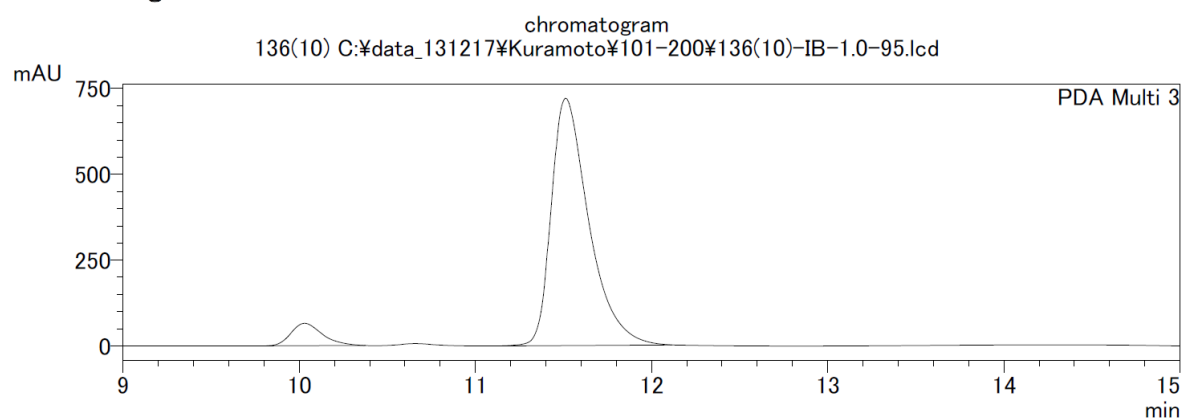

1 PDA Multi 3 / 220nm 4nm

#### <Peak Report>

peak table C:\data\_131217\Kuramoto\101-200\136(10)-IB-1.0-95.lcd

PDA Ch3 220nm 4nm

| peak # | retention time (min) | area     | area (%) |
|--------|----------------------|----------|----------|
| 1      | 10.025               | 806139   | 7.014    |
| 2      | 11.507               | 10687644 | 92.986   |

# ==== Shimadzu LCsolution Analysis Report =====

sample ID : rac-methyl  
 method name : 95-IPA5-4.4-auto-shoki-60min.lcm  
 acquisition date : 2014/05/27 16:57:48  
 modified date : 2014/05/28 11:52:55

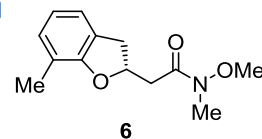

## <Chromatogram>

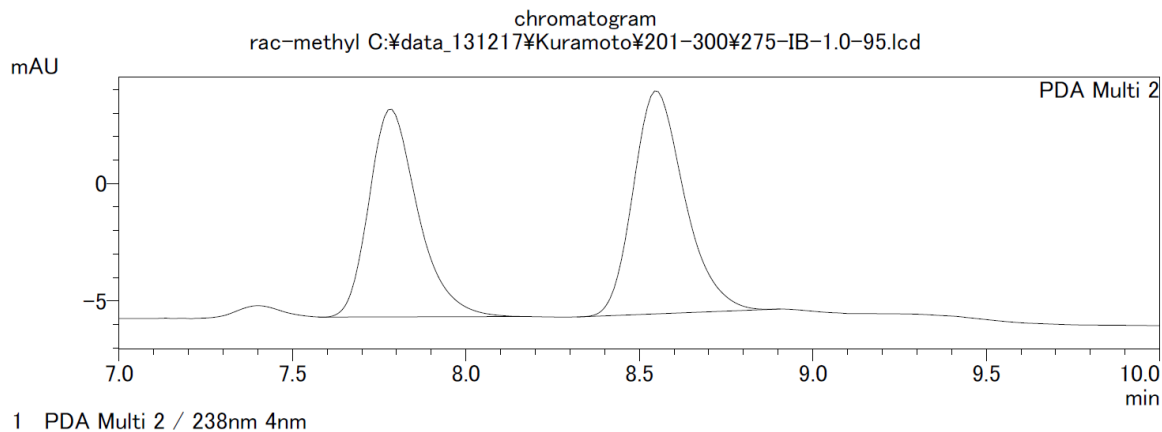

## <Peak Report>

peak table C:\data\_131217\Kuramoto\201-300\275-IB-1.0-95.lcd

PDA Ch2 238nm 4nm

| peak # | retention time (min) | area  | area (%) |
|--------|----------------------|-------|----------|
| 1      | 7.777                | 87048 | 46.948   |
| 2      | 8.543                | 98365 | 53.052   |

# ==== Shimadzu LCsolution Analysis Report =====

sample ID : 308(275)  
 method name : (275)95-IPA5-4.4-auto-shoki-20min.lcm  
 acquisition date : 2014/07/10 22:30:58  
 modified date : 2015/09/12 10:38:46

## <Chromatogram>

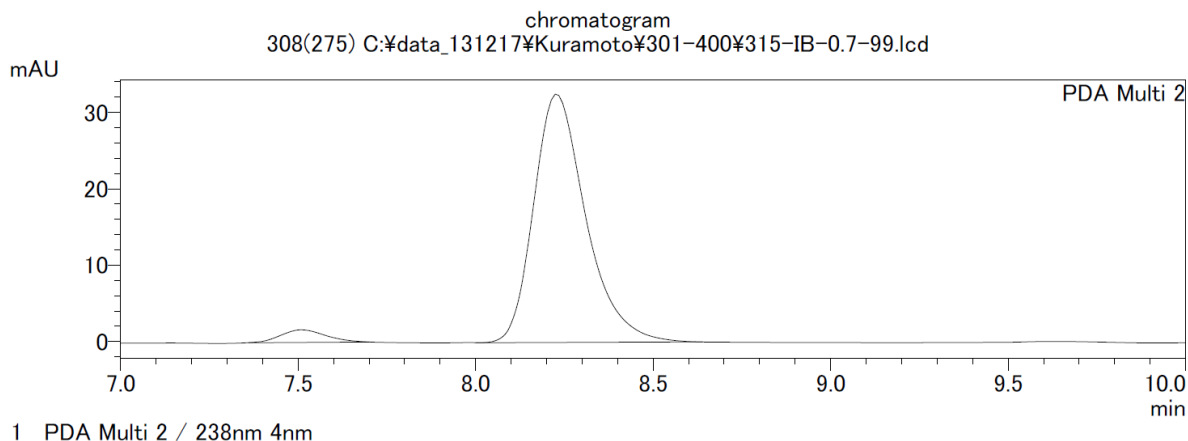

## <Peak Report>

peak table C:\data\_131217\Kuramoto\301-400\315-IB-0.7-99.lcd

PDA Ch2 238nm 4nm

| peak # | retention time (min) | area   | area (%) |
|--------|----------------------|--------|----------|
| 1      | 7.504                | 14565  | 4.204    |
| 2      | 8.222                | 331901 | 95.796   |



# ==== Shimadzu LCsolution Analysis Report =====

sample ID : 112rac  
 method name : 99-IPA.1.0-4.4-60min-1.0v-auto.lcm  
 acquisition date : 2013/11/07 19:38:12  
 modified date : 2013/11/09 10:37:48

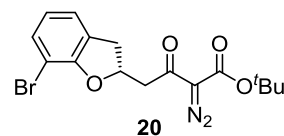

## <Chromatogram>

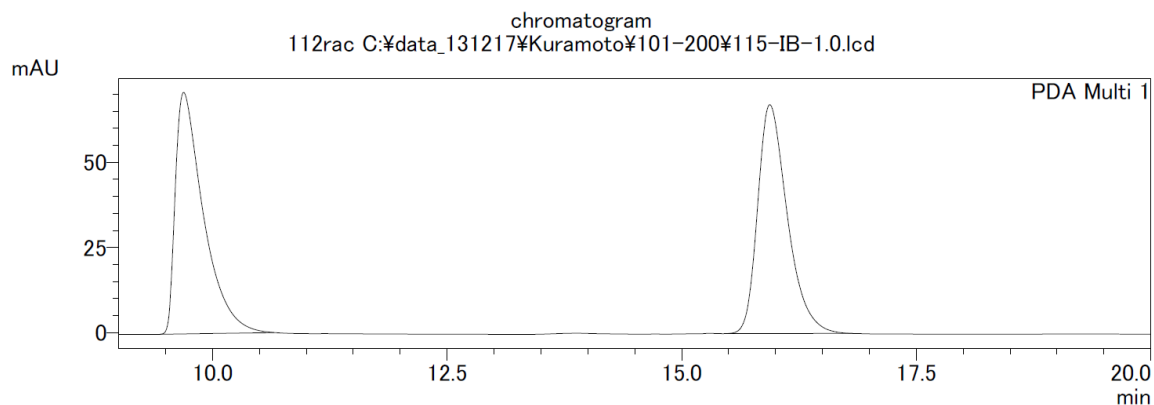

1 PDA Multi 1 / 254nm 4nm

## <Peak Report>

peak table C:\data\_131217\Kuramoto\101-200\115-IB-1.0.lcd

PDA Ch1 254nm 4nm

| peak # | retention time (min) | area    | area (%) |
|--------|----------------------|---------|----------|
| 1      | 9.687                | 1475589 | 49.883   |
| 2      | 15.934               | 1482503 | 50.117   |

# ==== Shimadzu LCsolution Analysis Report =====

sample ID : 266p(115)  
 method name : (115)99-IPA.1.0-4.4-30min-1.0v-auto.lcm  
 acquisition date : 2014/05/22 15:19:07  
 modified date : 2014/05/26 16:43:50

## <Chromatogram>

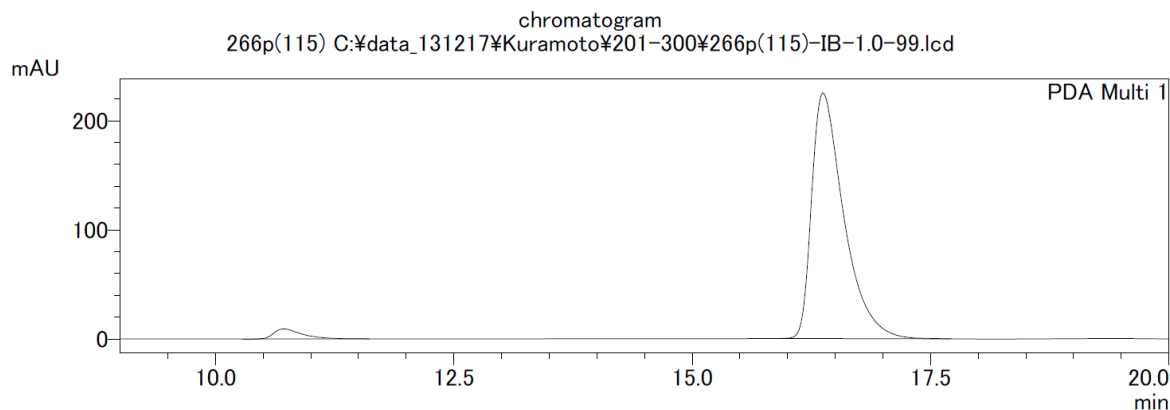

1 PDA Multi 1 / 254nm 4nm

## <Peak Report>

peak table C:\data\_131217\Kuramoto\201-300\266p(115)-IB-1.0-99.lcd

PDA Ch1 254nm 4nm

| peak # | retention time (min) | area    | area (%) |
|--------|----------------------|---------|----------|
| 1      | 10.709               | 189238  | 3.462    |
| 2      | 16.366               | 5276934 | 96.538   |

# ==== Shimadzu LCsolution Analysis Report =====

sample ID : C:\data\_131217\Kuramoto\201-300\244-AD-1.0-96.lcd  
 method name : rac-formal  
 acquisition date : 95-IPA5-2.2-auto-shoki-60min.lcm  
 modified date : 2014/04/25 16:28:57  
 : 2015/09/11 22:12:50

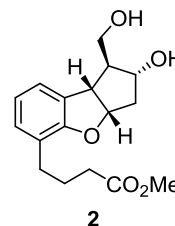

## <Chromatogram>

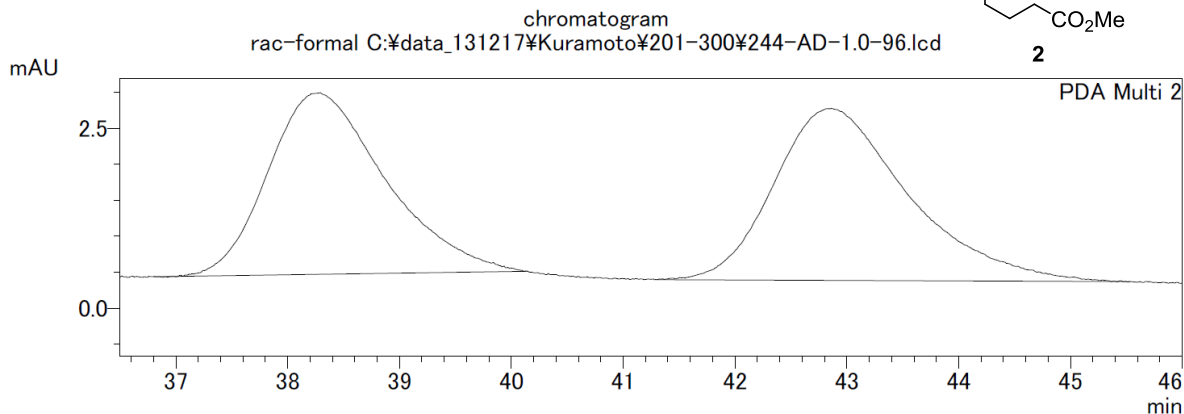

1 PDA Multi 2 / 238nm 4nm

## <Peak Report>

peak table C:\data\_131217\Kuramoto\201-300\244-AD-1.0-96.lcd

PDA Ch2 238nm 4nm

| peak # | retention time (min) | area   | area (%) |
|--------|----------------------|--------|----------|
| 1      | 38.286               | 183781 | 47.956   |
| 2      | 42.831               | 199445 | 52.044   |

# ==== Shimadzu LCsolution Analysis Report =====

sample ID : C:\data\_131217\Kuramoto\201-300\297(244)-AD-1.0-95.lcd  
 method name : 297(244)  
 acquisition date : (244)95-IPA5-2.2-auto-shoki-60min.lcm  
 modified date : 2014/07/10 18:24:18  
 : 2015/09/11 21:32:56

## <Chromatogram>

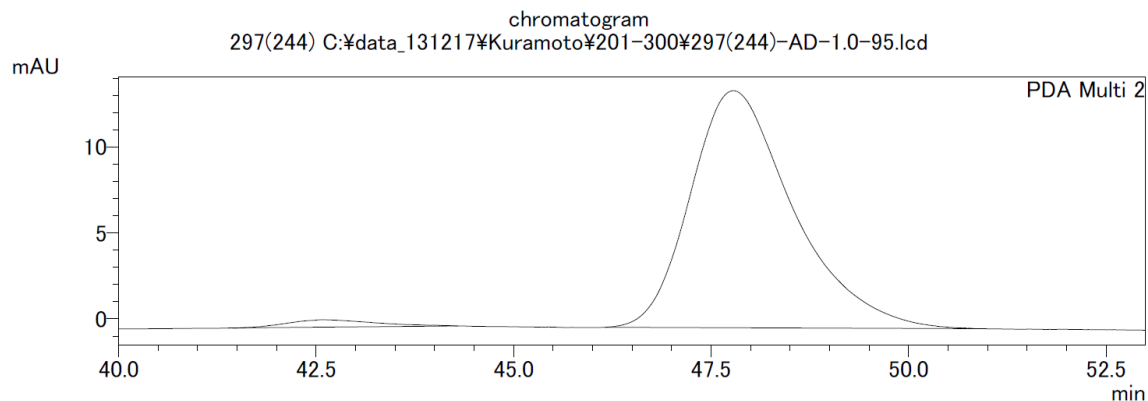

1 PDA Multi 2 / 238nm 4nm

## <Peak Report>

peak table C:\data\_131217\Kuramoto\201-300\297(244)-AD-1.0-95.lcd

PDA Ch2 238nm 4nm

| peak # | retention time (min) | area    | area (%) |
|--------|----------------------|---------|----------|
| 1      | 42.596               | 32699   | 2.555    |
| 2      | 47.775               | 1246956 | 97.445   |

## 6. Computational details

The proposed transition states for oxa-Michael reactions (B3LYP/6-31G\* level using Gaussian 09)

### Benzothiadiazine-TS

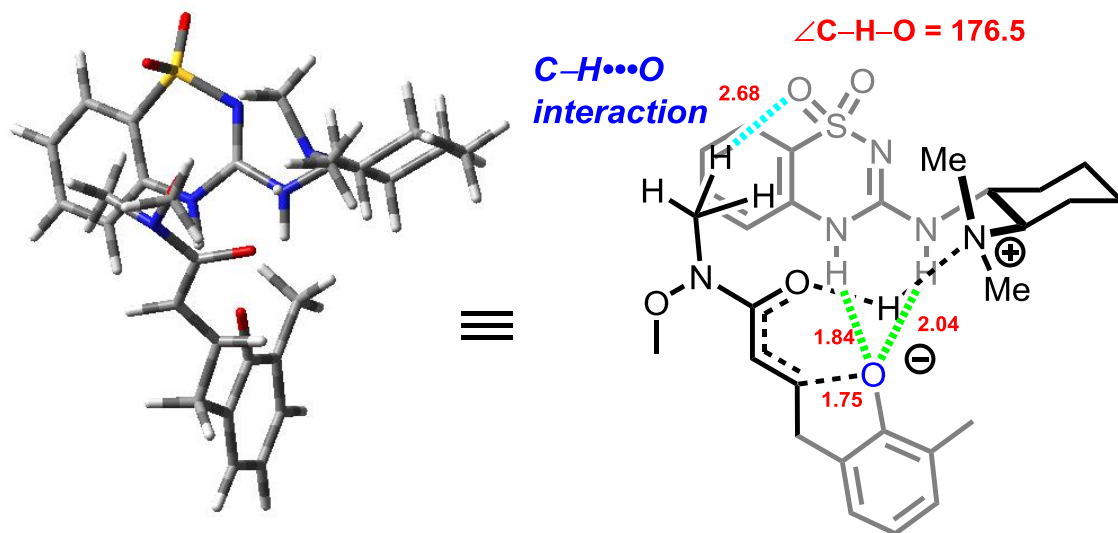

### Thiourea-TS

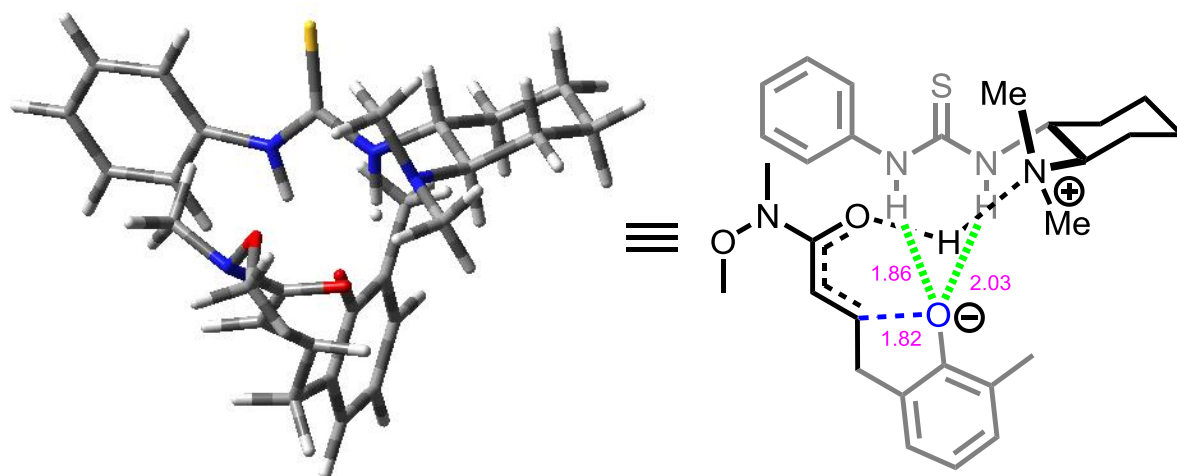

The energy profile of the reaction pathway estimated by DFT calculations at B3LYP/6-31G\* and B3LYP/6-311+G\*\*// B3LYP/6-31G\* level using Gaussian 09)

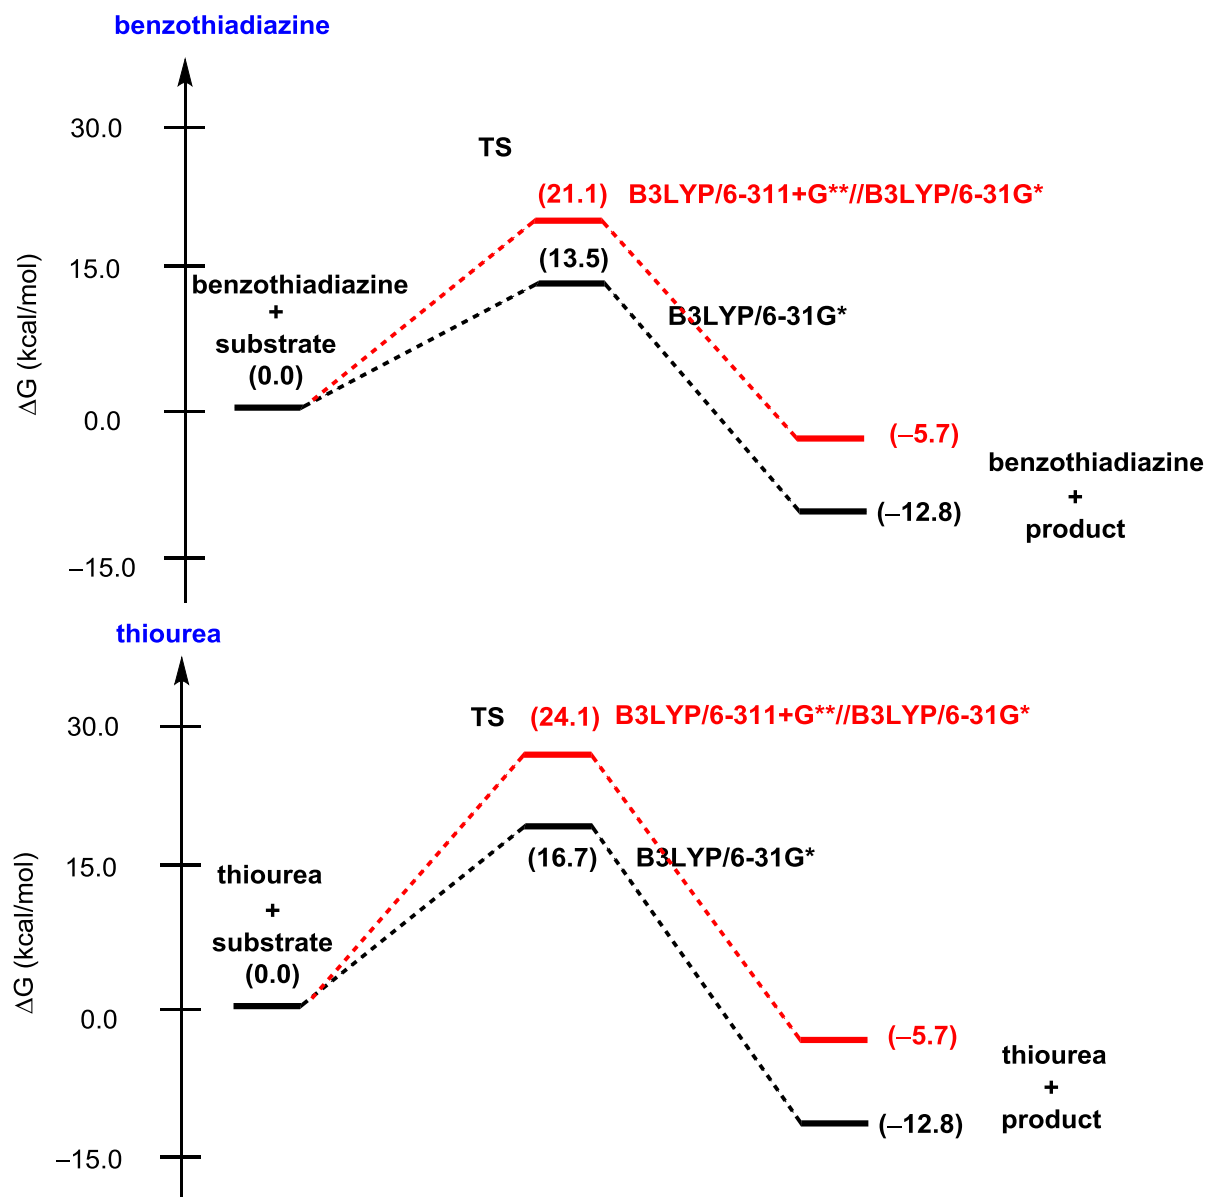

## Cartesian coordinates and total energies for all the calculated structures

### Substrate 8

|                                              |                             |
|----------------------------------------------|-----------------------------|
| Zero-point vibrational energy                | 740289.1 (Joules/Mol)       |
|                                              | 176.93334 (Kcal/Mol)        |
| Zero-point correction=                       | 0.281961 (Hartree/Particle) |
| Thermal correction to Energy=                | 0.300108                    |
| Thermal correction to Enthalpy=              | 0.301053                    |
| Thermal correction to Gibbs Free Energy=     | 0.233570                    |
| Sum of electronic and zero-point Energies=   | -785.685771                 |
| Sum of electronic and thermal Energies=      | -785.667624                 |
| Sum of electronic and thermal Enthalpies=    | -785.666680                 |
| Sum of electronic and thermal Free Energies= | -785.734162                 |
| E(RB3LYP) =                                  | -785.967732157              |
| E(RB3LYP/6-311+G**) =                        | -786.196320217              |

0 1

|   |             |             |             |
|---|-------------|-------------|-------------|
| C | 0.30861700  | -1.20931800 | 0.54473000  |
| C | 1.34822000  | -0.39537500 | 0.76338400  |
| C | 2.54184200  | -0.45484200 | -0.12672100 |
| O | 2.72128300  | -1.35623200 | -0.93492500 |
| C | -0.94736500 | -1.25064500 | 1.37578100  |
| C | -2.17699300 | -0.86567700 | 0.57089100  |
| C | -4.41157600 | -0.11924300 | -0.95085400 |
| C | -2.47917300 | 0.48774100  | 0.34774900  |
| C | -3.01945300 | -1.83082100 | 0.01334900  |
| C | -4.13232200 | -1.46909300 | -0.74526600 |
| C | -3.59706200 | 0.88024800  | -0.40910300 |
| O | -1.63484400 | 1.41063800  | 0.91542300  |
| N | 3.51742200  | 0.52404300  | 0.10002900  |
| C | 3.23669100  | 1.91160800  | 0.44263700  |
| O | 4.56105200  | 0.51514500  | -0.85053800 |
| C | 5.57976400  | -0.40862800 | -0.46489200 |
| C | -3.89643600 | 2.34616800  | -0.62411300 |
| H | -3.08016400 | 2.86557500  | -1.14733500 |
| H | -4.07399700 | 2.87855100  | 0.32204000  |
| H | -4.79564300 | 2.47315400  | -1.23315800 |

|   |             |             |             |
|---|-------------|-------------|-------------|
| H | 4.11501300  | 2.34088100  | 0.93236500  |
| H | 2.38891600  | 1.96856700  | 1.12487200  |
| H | 3.01090200  | 2.49874900  | -0.45733300 |
| H | 5.96963900  | -0.17408400 | 0.53381000  |
| H | 6.36963800  | -0.28088200 | -1.21002500 |
| H | 5.20511700  | -1.43564800 | -0.49466000 |
| H | 1.32681600  | 0.29986500  | 1.59690000  |
| H | -0.84168700 | -0.59076900 | 2.24310800  |
| H | -1.08698700 | -2.27255500 | 1.75419300  |
| H | -2.79648600 | -2.88194800 | 0.18236800  |
| H | -5.27789600 | 0.17315700  | -1.53973200 |
| H | -4.77727700 | -2.23239500 | -1.17048200 |
| H | 0.36398600  | -1.88903100 | -0.30436000 |
| H | -1.95029400 | 2.30135700  | 0.70211200  |

### Product 6

Zero-point vibrational energy      746086.3 (Joules/Mol)

178.31891 (Kcal/Mol)

Zero-point correction=      0.284169 (Hartree/Particle)

Thermal correction to Energy=      0.301237

Thermal correction to Enthalpy=      0.302181

Thermal correction to Gibbs Free Energy=      0.237638

Sum of electronic and zero-point Energies=      -785.708093

Sum of electronic and thermal Energies=      -785.691026

Sum of electronic and thermal Enthalpies=      -785.690081

Sum of electronic and thermal Free Energies=      -785.754624

E(RB3LYP) = -785.992262589

E(RB3LYP/6-311+G\*\*) = -786.209488474

0 1

|   |             |             |             |
|---|-------------|-------------|-------------|
| C | 0.12912900  | 0.16896500  | 0.64672500  |
| C | -1.09240500 | 0.81013000  | -0.00151000 |
| C | -2.37169800 | 0.05882200  | 0.36467100  |
| O | -2.37474200 | -0.87244000 | 1.15715100  |
| C | 0.53213800  | -1.22472100 | 0.10042700  |
| C | 2.02687400  | -1.07603100 | -0.06564600 |

|   |             |             |             |
|---|-------------|-------------|-------------|
| C | 4.63442700  | -0.16843300 | -0.33029700 |
| C | 2.34794800  | 0.27012000  | 0.10534800  |
| C | 3.02794700  | -1.98886000 | -0.37767600 |
| C | 4.34226100  | -1.52434200 | -0.50628200 |
| C | 3.64398900  | 0.77445300  | -0.01754400 |
| O | 1.26233900  | 1.05371400  | 0.40172400  |
| N | -3.51374700 | 0.44134100  | -0.31901800 |
| C | -3.74609100 | 1.74383700  | -0.92240800 |
| O | -4.71512500 | -0.06132300 | 0.21559000  |
| C | -5.02883400 | -1.33123500 | -0.36350800 |
| C | 3.93446600  | 2.23973800  | 0.17973000  |
| H | 3.41257600  | 2.85603400  | -0.56325500 |
| H | 5.00664800  | 2.44237000  | 0.09539900  |
| H | 3.59665600  | 2.58385500  | 1.16485400  |
| H | -4.50186800 | 1.63744400  | -1.70493400 |
| H | -2.82517000 | 2.11139600  | -1.37677100 |
| H | -4.10359600 | 2.47249700  | -0.18277500 |
| H | -5.10138800 | -1.26176300 | -1.45631700 |
| H | -6.00316600 | -1.59579900 | 0.05532400  |
| H | -4.28557300 | -2.08089100 | -0.07842200 |
| H | -1.16523700 | 1.85366600  | 0.33203800  |
| H | 0.04104200  | -1.43517000 | -0.86084200 |
| H | 0.23221200  | -2.01652800 | 0.79152600  |
| H | 2.79767500  | -3.04219400 | -0.51703300 |
| H | 5.66202300  | 0.17402800  | -0.43197600 |
| H | 5.14227600  | -2.22022700 | -0.74269200 |
| H | -0.01399500 | 0.11934200  | 1.73100700  |
| H | -0.95556400 | 0.83827600  | -1.08990400 |

### Benzothiadiazine catalyst C

|                                          |                             |
|------------------------------------------|-----------------------------|
| Zero-point vibrational energy            | 976455.3 (Joules/Mol)       |
|                                          | 233.37843 (Kcal/Mol)        |
| Zero-point correction=                   | 0.371912 (Hartree/Particle) |
| Thermal correction to Energy=            | 0.392165                    |
| Thermal correction to Enthalpy=          | 0.393109                    |
| Thermal correction to Gibbs Free Energy= | 0.322992                    |

|                                              |              |
|----------------------------------------------|--------------|
| Sum of electronic and zero-point Energies=   | -1352.060099 |
| Sum of electronic and thermal Energies=      | -1352.039846 |
| Sum of electronic and thermal Enthalpies=    | -1352.038902 |
| Sum of electronic and thermal Free Energies= | -1352.109019 |

E(RB3LYP) = -1352.43201124

E(RB3LYP/6-311+G\*\*) = -1352.71927733

0 1

|   |             |             |             |
|---|-------------|-------------|-------------|
| H | -1.18071200 | 1.46050600  | -0.54854300 |
| N | -0.95035900 | 0.46707800  | -0.61002600 |
| C | 3.17907900  | -0.08418300 | 0.13971300  |
| C | -2.06264000 | -0.34047100 | -0.09871100 |
| C | -4.54497800 | -0.24861100 | 0.36642600  |
| C | -3.45873500 | -2.43391900 | -0.34029500 |
| C | -4.73831400 | -1.58543100 | -0.37002800 |
| C | -2.24899700 | -1.65389600 | -0.87611500 |
| C | -3.33940600 | 0.52550800  | -0.20466700 |
| H | -4.38676900 | -0.44302000 | 1.43581700  |
| H | -3.25565600 | -2.75230200 | 0.69222200  |
| H | -5.01643600 | -1.38391100 | -1.41492000 |
| H | -2.39376800 | -1.41510400 | -1.93911000 |
| H | -3.52067100 | 0.67808200  | -1.27877400 |
| H | -1.87085800 | -0.59488600 | 0.95350800  |
| H | -5.45293900 | 0.36221500  | 0.28653800  |
| H | -3.59715100 | -3.35118700 | -0.92487100 |
| H | -5.57585200 | -2.13782000 | 0.07368000  |
| H | -1.33747200 | -2.25227400 | -0.79712000 |
| N | -3.10162500 | 1.88135400  | 0.33402300  |
| C | -4.04227800 | 2.87672000  | -0.17128300 |
| H | -3.71051200 | 3.87540300  | 0.13448300  |
| H | -5.07447200 | 2.74055900  | 0.19804200  |
| H | -4.06455600 | 2.84570800  | -1.26575400 |
| C | -2.98222700 | 1.96018300  | 1.79003700  |
| H | -2.25526000 | 1.22890200  | 2.15387100  |
| H | -3.93573000 | 1.79243400  | 2.31954600  |
| H | -2.62006800 | 2.95728700  | 2.06387000  |
| N | 0.63460800  | -0.94213000 | 0.33469200  |



|   |            |             |             |
|---|------------|-------------|-------------|
| C | 0.34841100 | 0.12550900  | -0.36004600 |
| N | 1.27692500 | 1.00558500  | -0.88499500 |
| C | 2.62629000 | 1.02011600  | -0.52252900 |
| H | 0.93280800 | 1.75589500  | -1.46832300 |
| C | 4.50386500 | -0.06266700 | 0.57597900  |
| C | 5.29919000 | 1.05093800  | 0.32006200  |
| H | 6.33329400 | 1.06948200  | 0.64979700  |
| C | 4.75889600 | 2.14299800  | -0.36866800 |
| H | 5.37493900 | 3.01371800  | -0.57474200 |
| C | 3.42953400 | 2.13961000  | -0.77951800 |
| H | 3.00667500 | 3.00267500  | -1.28855400 |
| H | 4.89363500 | -0.92427000 | 1.10869700  |
| S | 2.17869600 | -1.55323000 | 0.30893800  |
| O | 2.35049100 | -2.36343700 | -0.90424200 |
| O | 2.45768700 | -2.15581800 | 1.61294700  |

#### Thiourea catalyst A

Zero-point vibrational energy      966825.3 (Joules/Mol)

231.07679 (Kcal/Mol)

Zero-point correction=      0.368244 (Hartree/Particle)

Thermal correction to Energy=      0.386912

Thermal correction to Enthalpy=      0.387856

Thermal correction to Gibbs Free Energy=      0.320181

Sum of electronic and zero-point Energies=      -1147.532254

Sum of electronic and thermal Energies=      -1147.513586

Sum of electronic and thermal Enthalpies=      -1147.512642

Sum of electronic and thermal Free Energies=      -1147.580317

E(RB3LYP) = -1147.90049817

E(RB3LYP/6-311+G\*\*) = -1148.12987606

0 1

|   |             |             |             |
|---|-------------|-------------|-------------|
| H | -0.54806900 | 1.03311100  | -0.58308800 |
| N | -0.49657600 | 0.01783900  | -0.48146800 |
| C | 3.71292000  | -0.18065200 | 0.92610700  |
| C | -1.79508700 | -0.51514400 | -0.07353800 |
| C | -4.22086900 | 0.11458000  | 0.22583200  |

|   |             |             |             |
|---|-------------|-------------|-------------|
| C | -3.58843100 | -2.26830400 | -0.39517300 |
| C | -4.65618500 | -1.16908300 | -0.50229200 |
| C | -2.21036500 | -1.77193900 | -0.85805700 |
| C | -2.84929600 | 0.59820100  | -0.28791800 |
| H | -4.16468500 | -0.07977200 | 1.30546900  |
| H | -3.51659000 | -2.60559800 | 0.64879700  |
| H | -4.83289800 | -0.93724700 | -1.56300900 |
| H | -2.23397900 | -1.52824200 | -1.92980400 |
| H | -2.93781700 | 0.74058400  | -1.37556900 |
| H | -1.74494100 | -0.78666300 | 0.99041200  |
| H | -4.97247300 | 0.90130900  | 0.08437200  |
| H | -3.88640000 | -3.14490300 | -0.98331600 |
| H | -5.61300800 | -1.52305600 | -0.09843700 |
| H | -1.45314200 | -2.54775700 | -0.71575100 |
| N | -2.36525900 | 1.89650700  | 0.22091700  |
| C | -3.07921200 | 3.03969000  | -0.33693600 |
| H | -2.55563400 | 3.96228500  | -0.06173000 |
| H | -4.12241800 | 3.13055500  | 0.01588200  |
| H | -3.09458500 | 2.97028100  | -1.42998000 |
| C | -2.25703300 | 1.99427400  | 1.67569800  |
| H | -1.67021500 | 1.16060600  | 2.07092800  |
| H | -3.23356900 | 2.00614200  | 2.19031700  |
| H | -1.73409000 | 2.92236200  | 1.93128800  |
| C | 0.70547500  | -0.47304100 | -0.04254700 |
| N | 1.74826200  | 0.30009300  | -0.51137300 |
| C | 3.14212700  | 0.22594300  | -0.28783600 |
| H | 1.49788000  | 0.89792800  | -1.29046900 |
| C | 5.09948800  | -0.16559700 | 1.07297900  |
| C | 5.93155300  | 0.26253600  | 0.03725000  |
| H | 7.01013300  | 0.27163100  | 0.16596100  |
| C | 5.36052600  | 0.68140400  | -1.16523400 |
| H | 5.98981700  | 1.02000900  | -1.98393400 |
| C | 3.97766200  | 0.65985000  | -1.32864400 |
| H | 3.53816200  | 0.97508900  | -2.27324900 |
| H | 5.53026400  | -0.48755800 | 2.01738400  |
| S | 0.86414900  | -1.84618900 | 0.91102800  |
| H | 3.07725900  | -0.50944200 | 1.73639900  |

**TS (catalyst C)**

Zero-point vibrational energy 1725582.1 (Joules/Mol)

412.42401 (Kcal/Mol)

Zero-point correction= 0.657240 (Hartree/Particle)

Thermal correction to Energy= 0.695225

Thermal correction to Enthalpy= 0.696169

Thermal correction to Gibbs Free Energy= 0.586205

Sum of electronic and zero-point Energies= -2137.750701

Sum of electronic and thermal Energies= -2137.712716

Sum of electronic and thermal Enthalpies= -2137.711772

Sum of electronic and thermal Free Energies= -2137.821735

E(RB3LYP) = -2138.40794093

Imaginary frequency = 190i

E(RB3LYP/6-311+G\*\*) = -2138.91153758

0 1

|   |             |             |             |
|---|-------------|-------------|-------------|
| C | -1.84435200 | -1.64002000 | 1.84192400  |
| C | -0.97765600 | -0.80910600 | 2.60484800  |
| C | 0.40828500  | -0.99040600 | 2.54053300  |
| O | 0.97669500  | -1.91329500 | 1.86670600  |
| C | -3.29452800 | -1.81486100 | 2.28460800  |
| C | -4.13701800 | -1.85166900 | 1.03336300  |
| C | -5.32780400 | -1.62136600 | -1.46040200 |
| C | -3.41199400 | -1.34318300 | -0.05486700 |
| C | -5.45830900 | -2.25267500 | 0.87169000  |
| C | -6.05671700 | -2.13967900 | -0.38753100 |
| C | -3.99422200 | -1.21074700 | -1.32699800 |
| H | 0.32943800  | 5.73331500  | -0.96676500 |
| C | -0.39509700 | 5.00540200  | -0.61552400 |
| C | -2.22947400 | 3.07121700  | 0.25195500  |
| C | -0.03646000 | 3.65740700  | -0.58256900 |
| C | -1.66680200 | 5.39040100  | -0.20140500 |
| C | -2.57352200 | 4.41868900  | 0.24049800  |
| C | -0.94976700 | 2.67674100  | -0.16821500 |
| H | -1.95194100 | 6.43778900  | -0.21918900 |
| H | -3.56691300 | 4.71334800  | 0.56720400  |

|   |             |             |             |
|---|-------------|-------------|-------------|
| H | -2.94305200 | 2.31654500  | 0.57118700  |
| S | 1.61890300  | 3.13060700  | -0.96723200 |
| N | -0.60527100 | 1.32676600  | -0.20203600 |
| H | -1.29228300 | 0.63251000  | 0.12402100  |
| N | 1.39621800  | 1.57656700  | -1.48137900 |
| C | 0.46397900  | 0.84467500  | -0.90781200 |
| N | 0.51857600  | -0.51651200 | -1.00846900 |
| H | -0.31391800 | -1.02330900 | -0.70180100 |
| O | 2.13669800  | 3.93126400  | -2.07841000 |
| O | 2.39322700  | 3.09435200  | 0.28869200  |
| C | 1.49625500  | -1.19240600 | -1.84790700 |
| C | 3.35125000  | -2.90669100 | -2.01690400 |
| C | 1.83296400  | -2.51108200 | -4.00953800 |
| C | 2.67767800  | -3.53652500 | -3.24715600 |
| C | 0.81951400  | -1.83613500 | -3.07710100 |
| C | 2.31113600  | -2.26391500 | -1.08278400 |
| H | 4.07008700  | -2.14407300 | -2.34658600 |
| H | 1.31117800  | -2.99107000 | -4.84573200 |
| H | 2.03875000  | -4.36943700 | -2.92043600 |
| H | 0.07836300  | -2.57411400 | -2.73612300 |
| H | 1.61848400  | -3.03618000 | -0.72503400 |
| H | 3.92016200  | -3.67710600 | -1.48680100 |
| H | 2.49030300  | -1.74654100 | -4.44694000 |
| H | 3.44559200  | -3.96871900 | -3.89915800 |
| H | 0.26780300  | -1.05174000 | -3.60599500 |
| O | -2.13296300 | -1.00130500 | 0.23526500  |
| N | 2.92031900  | -1.72774600 | 0.20343400  |
| C | 3.71999800  | -0.47005400 | 0.08619000  |
| H | 4.61867400  | -0.65766800 | -0.50707600 |
| H | 3.98824400  | -0.16392700 | 1.09776500  |
| H | 3.12629000  | 0.32201400  | -0.36850700 |
| C | 3.69570100  | -2.76788200 | 0.94117300  |
| H | 4.65593500  | -2.94960400 | 0.45585400  |
| H | 3.10730800  | -3.68555700 | 0.98556300  |
| H | 3.84787600  | -2.39537000 | 1.95278900  |
| N | 1.22313500  | -0.14984900 | 3.36089200  |
| C | 1.06448900  | 1.30386500  | 3.32966200  |

|   |             |             |             |
|---|-------------|-------------|-------------|
| O | 2.61348100  | -0.43126000 | 3.21562100  |
| C | 3.05322300  | -1.13470000 | 4.37371000  |
| C | -3.21020400 | -0.65079600 | -2.48661900 |
| H | -2.30600400 | -1.24045300 | -2.68574200 |
| H | -2.87849600 | 0.37835100  | -2.29720200 |
| H | -3.81294200 | -0.64303500 | -3.40035900 |
| H | 1.53372400  | 1.73304900  | 4.22011000  |
| H | 0.00176700  | 1.54565500  | 3.34447300  |
| H | 1.52142000  | 1.74774900  | 2.43528700  |
| H | 2.83572400  | -0.56846700 | 5.28702700  |
| H | 4.13781600  | -1.24270000 | 4.26288100  |
| H | 2.58422900  | -2.12381600 | 4.43789000  |
| H | -1.40600800 | -0.05553900 | 3.25673200  |
| H | -3.59063300 | -0.97828500 | 2.93432000  |
| H | -3.38888100 | -2.72947600 | 2.88307400  |
| H | -6.02020500 | -2.64767500 | 1.71532400  |
| H | -5.80208900 | -1.53380000 | -2.43605600 |
| H | -7.08666400 | -2.45335400 | -0.53317700 |
| H | -1.37804700 | -2.56234700 | 1.50011000  |
| H | 2.07927900  | -1.57088000 | 0.88804200  |
| H | 2.17594300  | -0.41540400 | -2.20628300 |

#### TS (catalyst A)

Zero-point vibrational energy      1716626.6 (Joules/Mol)

410.28361 (Kcal/Mol)

Zero-point correction=                      0.653829 (Hartree/Particle)

Thermal correction to Energy=              0.690259

Thermal correction to Enthalpy=            0.691204

Thermal correction to Gibbs Free Energy=    0.583293

Sum of electronic and zero-point Energies=    -1933.217289

Sum of electronic and thermal Energies=    -1933.180858

Sum of electronic and thermal Enthalpies=   -1933.179914

Sum of electronic and thermal Free Energies= -1933.287824

E(RB3LYP) = -1933.87111706

Imaginary frequency = 208i

E(RB3LYP/6-311+G\*\*) = -1934.31737508

|     |             |             |             |
|-----|-------------|-------------|-------------|
| 0 1 |             |             |             |
| C   | -1.22856100 | -0.51622500 | 2.34154700  |
| C   | -0.72109200 | 0.80056000  | 2.39411800  |
| C   | 0.65841400  | 1.02685200  | 2.27688200  |
| O   | 1.53045500  | 0.10236400  | 2.21542800  |
| C   | -2.59735600 | -0.83499400 | 2.92330400  |
| C   | -3.27114400 | -1.82709700 | 2.00683700  |
| C   | -4.28989500 | -3.41825400 | -0.02187600 |
| C   | -2.65328900 | -1.84125800 | 0.74432400  |
| C   | -4.38728500 | -2.61763900 | 2.25684400  |
| C   | -4.89861100 | -3.42428100 | 1.23540100  |
| C   | -3.16298600 | -2.63427500 | -0.30167300 |
| H   | -2.10635300 | 5.02369700  | -3.19359200 |
| C   | -2.36989600 | 4.17112100  | -2.57265100 |
| C   | -3.01666600 | 1.98445000  | -0.99203300 |
| C   | -1.41514900 | 3.17334800  | -2.36682200 |
| C   | -3.63941800 | 4.09178200  | -2.00198500 |
| C   | -3.95547600 | 2.98752200  | -1.20712500 |
| C   | -1.73475800 | 2.06309300  | -1.57088700 |
| H   | -4.37211200 | 4.87540100  | -2.17365300 |
| H   | -4.93858500 | 2.90167500  | -0.75173300 |
| H   | -3.26881900 | 1.12743300  | -0.37305700 |
| N   | -0.86818700 | 0.99383500  | -1.25152900 |
| H   | -1.26285200 | 0.36535200  | -0.53790500 |
| C   | 0.37105400  | 0.63570600  | -1.68144100 |
| N   | 0.87786900  | -0.42198900 | -0.95369100 |
| H   | 0.22165700  | -0.86625200 | -0.30505800 |
| C   | 2.00519900  | -1.23220000 | -1.38688700 |
| C   | 4.18525900  | -2.35317900 | -0.74562100 |
| C   | 2.71649900  | -3.40276200 | -2.52798200 |
| C   | 3.71743200  | -3.66476200 | -1.39855300 |
| C   | 1.53877300  | -2.55737000 | -2.02848000 |
| C   | 2.99037800  | -1.53210800 | -0.23285900 |
| H   | 4.74830700  | -1.76352800 | -1.48199300 |
| H   | 2.35073500  | -4.35034600 | -2.94077200 |
| H   | 3.25011000  | -4.30095900 | -0.63333900 |

|   |             |             |             |
|---|-------------|-------------|-------------|
| H | 0.95368600  | -3.12979700 | -1.29421200 |
| H | 2.46219300  | -2.10497900 | 0.54000000  |
| H | 4.87297200  | -2.58720500 | 0.07362300  |
| H | 3.22063400  | -2.87598000 | -3.35038700 |
| H | 4.59006200  | -4.21402800 | -1.77101900 |
| H | 0.86198200  | -2.30793000 | -2.85241800 |
| O | -1.57111400 | -1.04453400 | 0.63190300  |
| N | 3.41642600  | -0.27133800 | 0.50826200  |
| C | 3.92970200  | 0.84565300  | -0.33881700 |
| H | 4.88357700  | 0.55991900  | -0.78946500 |
| H | 4.05878700  | 1.71038500  | 0.31281800  |
| H | 3.20453000  | 1.09397000  | -1.11566400 |
| C | 4.35950300  | -0.55504100 | 1.62961800  |
| H | 5.35653200  | -0.78026000 | 1.24803800  |
| H | 3.97314800  | -1.38994000 | 2.21570100  |
| H | 4.38796600  | 0.33312500  | 2.25985300  |
| N | 1.11277800  | 2.38088400  | 2.33229000  |
| C | 0.50661700  | 3.39943100  | 1.47899300  |
| O | 2.52709400  | 2.48396400  | 2.18202900  |
| C | 3.10203800  | 2.71183300  | 3.46544500  |
| C | -2.51404400 | -2.62798600 | -1.66219600 |
| H | -1.47517700 | -2.97900900 | -1.61634100 |
| H | -2.48498600 | -1.62017700 | -2.09545500 |
| H | -3.05582700 | -3.27623700 | -2.35856200 |
| H | 0.78530400  | 4.38934100  | 1.85156500  |
| H | -0.57780600 | 3.30169300  | 1.51423600  |
| H | 0.83442600  | 3.30335700  | 0.43470700  |
| H | 2.67822600  | 3.60697700  | 3.93594400  |
| H | 4.17230900  | 2.86479200  | 3.28847800  |
| H | 2.95243300  | 1.84840300  | 4.12417500  |
| H | -1.40839700 | 1.63053600  | 2.51504100  |
| H | -3.18985700 | 0.08799200  | 3.00815500  |
| H | -2.47588800 | -1.22588400 | 3.94200600  |
| H | -4.86019600 | -2.60459800 | 3.23679500  |
| H | -4.69733500 | -4.04145400 | -0.81592900 |
| H | -5.76761600 | -4.05106600 | 1.41565400  |
| H | -0.48332600 | -1.29197800 | 2.50032000  |

|   |             |             |             |
|---|-------------|-------------|-------------|
| H | 2.53880400  | 0.06344000  | 1.05638100  |
| H | 2.51839700  | -0.65205900 | -2.15875800 |
| H | -0.43808100 | 3.24733900  | -2.82108000 |
| S | 1.24820600  | 1.36645100  | -2.93861400 |
